# Supplementary material for: HPV-Related Prognostic Signature Predicts Survival in Head and Neck Squamous Cell Carcinoma
Source: Hindawi journal article supplement (doi:10.1155/2022/7357566), 2022-11-15
Supplement: f1 [file 7357566.f1.zip]

Supplemental Table 1: HPV-associated signatures with significant differences from the GSE6

| ID                  | logFC        | AveExpr     | t            | P.Value     | adj.P.Val   |
|---------------------|--------------|-------------|--------------|-------------|-------------|
| SPRR2G              | -1.105550505 | 9.196647442 | -4.409179214 | 1.50E-05    | 0.002304779 |
| KRTDAP              | -0.952230934 | 10.5108414  | -3.545743948 | 0.000461712 | 0.01839659  |
| TMEM16 <sub>4</sub> | -0.716720468 | 9.168749421 | -4.478231493 | 1.11E-05    | 0.001919325 |
| ANO1                | -0.713561082 | 8.806991904 | -4.473054991 | 1.14E-05    | 0.001940337 |
| PTHLH               | -0.711217508 | 8.591499433 | -4.340251983 | 2.02E-05    | 0.002752864 |
| GJB6                | -0.711064964 | 9.966285637 | -3.837648798 | 0.000154911 | 0.009615422 |
| KRT1                | -0.699769285 | 7.957557179 | -3.253782896 | 0.001284544 | 0.033167208 |
| SPRR2B              | -0.690117193 | 8.219047019 | -3.419930252 | 0.000723723 | 0.024021704 |
| DSG1                | -0.676298671 | 8.090041227 | -3.780597578 | 0.000192803 | 0.011129992 |
| MMP3                | -0.664068998 | 9.234131656 | -3.393466978 | 0.000794177 | 0.025327224 |
| CXCL14              | -0.643352549 | 9.058984907 | -4.013745145 | 7.76E-05    | 0.0063791   |
| IGFBP6              | -0.635242067 | 8.823435819 | -3.916488535 | 0.000114    | 0.008011159 |
| MMP1                | -0.587965339 | 9.613117977 | -3.172345125 | 0.001687668 | 0.038749359 |
| KRT16               | -0.587455654 | 11.08367575 | -3.383964247 | 0.000821002 | 0.025661285 |
| KRT14               | -0.58063643  | 11.85189185 | -3.106056015 | 0.002099038 | 0.044519458 |
| LOC65135            | -0.55325349  | 11.84235409 | -3.07417973  | 0.002328157 | 0.047148931 |
| TNC                 | -0.551581184 | 9.857801785 | -4.218859819 | 3.36E-05    | 0.003729274 |
| COL4A6              | -0.512482274 | 7.59873296  | -5.076352759 | 7.20E-07    | 0.000270375 |
| CAV1                | -0.508751397 | 9.289790255 | -4.61721291  | 6.03E-06    | 0.001319697 |
| CCND1               | -0.503545677 | 11.12292405 | -4.178518391 | 3.97E-05    | 0.004195649 |
| SLC7A5              | -0.489499465 | 9.918143    | -4.449352605 | 1.26E-05    | 0.002059161 |
| SERPINE1            | -0.488769632 | 8.370756952 | -3.601590724 | 0.000376649 | 0.016416306 |
| GJB2                | -0.484987282 | 11.75240634 | -3.204281685 | 0.001517345 | 0.036358362 |
| IGFBP3              | -0.450193437 | 9.63411701  | -3.533959    | 0.000481829 | 0.018822333 |
| NT5E                | -0.442639789 | 7.834106549 | -4.477342461 | 1.12E-05    | 0.001919325 |
| F2RL1               | -0.434450297 | 8.150277801 | -4.614303645 | 6.11E-06    | 0.001319697 |
| GJA1                | -0.433596355 | 10.47943929 | -3.386074348 | 0.000814974 | 0.025545532 |
| DKK3                | -0.42724983  | 10.04142932 | -4.201663176 | 3.61E-05    | 0.00392592  |
| SPINK6              | -0.421344389 | 7.055107    | -3.225466358 | 0.001413301 | 0.034868751 |
| KRT17               | -0.419038837 | 12.66982538 | -3.823708531 | 0.000163458 | 0.00997051  |
| PPFIA1              | -0.408478636 | 8.268053954 | -4.132597397 | 4.80E-05    | 0.004622417 |
| DMKN                | -0.403860969 | 8.432069733 | -3.34208143  | 0.000949616 | 0.027858358 |
| TUBB2A              | -0.4037235   | 8.733781685 | -3.560973059 | 0.000436882 | 0.017863091 |
| THBS1               | -0.403063861 | 8.662558433 | -3.225336267 | 0.00141392  | 0.034868751 |
| FKBP9L              | -0.397216308 | 9.898603477 | -5.152263476 | 4.99E-07    | 0.000207078 |
| HSPC159             | -0.393462758 | 8.392172363 | -3.673859253 | 0.000288319 | 0.014268537 |
| COL4A1              | -0.393060702 | 10.23279949 | -3.561634379 | 0.000435833 | 0.017863091 |
| FADD                | -0.390443733 | 8.945675492 | -3.485173106 | 0.000574177 | 0.020811935 |
| CDK6                | -0.390339347 | 8.79496705  | -4.553065689 | 8.02E-06    | 0.001546141 |
| SESN3               | -0.388379168 | 7.631070369 | -4.354699661 | 1.90E-05    | 0.002688854 |
| CTTN                | -0.385618447 | 8.601521973 | -4.40626425  | 1.52E-05    | 0.002304779 |
| RGS20               | -0.378894046 | 7.537924021 | -4.133647859 | 4.78E-05    | 0.004622417 |
| GSTA4               | -0.378688123 | 8.731373448 | -3.220852226 | 0.001435383 | 0.035185616 |
| NIPAL4              | -0.375558513 | 8.032800577 | -3.390025329 | 0.000803797 | 0.025419163 |
| DLL1                | -0.369625718 | 8.5547989   | -4.658381082 | 5.02E-06    | 0.001185747 |
| PPP1R14C            | -0.36729574  | 8.413379662 | -3.942667737 | 0.000102851 | 0.007621426 |
| ORAOV1              | -0.366673245 | 8.175908855 | -3.396189331 | 0.000786645 | 0.025223725 |
| TUBB3               | -0.365196705 | 8.174215609 | -3.517496395 | 0.00051131  | 0.019404175 |
| PYGL                | -0.353086056 | 9.824612167 | -3.218697294 | 0.001445804 | 0.035337772 |

|          |              |             |              |             |             |
|----------|--------------|-------------|--------------|-------------|-------------|
| IRX2     | -0.349958063 | 7.876394485 | -3.869700077 | 0.000136836 | 0.008902581 |
| CD36     | -0.348282505 | 7.302059807 | -3.950112088 | 9.99E-05    | 0.007489916 |
| MYH10    | -0.346527123 | 9.53779027  | -3.491882555 | 0.00056056  | 0.020548    |
| MAGEA4   | -0.346139844 | 7.017378543 | -3.05259784  | 0.002496126 | 0.0491024   |
| HTRA1    | -0.345751245 | 9.068318669 | -3.524401672 | 0.000498744 | 0.019210951 |
| DSC1     | -0.345718216 | 6.986964185 | -3.228375828 | 0.00139954  | 0.034748138 |
| PRSS23   | -0.345447256 | 8.838320513 | -3.756843452 | 0.000211032 | 0.011709633 |
| FAM89A   | -0.342920927 | 8.154854944 | -5.011677821 | 9.80E-07    | 0.000331281 |
| KRT17P3  | -0.341661203 | 8.548085768 | -3.404674309 | 0.000763592 | 0.024873935 |
| DHCR7    | -0.340750813 | 8.383881835 | -3.106449791 | 0.002096342 | 0.044505244 |
| TMEM166  | -0.338345452 | 7.62485167  | -3.223256213 | 0.001423839 | 0.035014549 |
| TNFRSF11 | -0.337899548 | 8.289832595 | -3.276538344 | 0.001189058 | 0.031707744 |
| STC1     | -0.330613137 | 7.861302632 | -3.493503991 | 0.000557315 | 0.02047808  |
| ME1      | -0.329337595 | 8.340678654 | -3.241441438 | 0.001339262 | 0.033976898 |
| MYO1B    | -0.329335662 | 9.116163022 | -4.239647412 | 3.08E-05    | 0.003563901 |
| SPOCK1   | -0.328379376 | 7.286015    | -3.723732608 | 0.000239172 | 0.012694051 |
| WDR66    | -0.32755167  | 8.981388676 | -3.275948425 | 0.001191448 | 0.03173296  |
| IGF2BP2  | -0.326148238 | 9.464010419 | -3.050532638 | 0.00251277  | 0.04925344  |
| RHOB     | -0.322889153 | 10.11986552 | -3.421487271 | 0.000719765 | 0.023994813 |
| FSCN1    | -0.321894759 | 11.77891728 | -4.174770213 | 4.03E-05    | 0.004215145 |
| CDA      | -0.320303788 | 7.514906838 | -3.17050142  | 0.001698022 | 0.038824799 |
| EFNB2    | -0.317847345 | 8.989719418 | -3.685421963 | 0.000276143 | 0.013980842 |
| IL24     | -0.317783796 | 7.473982488 | -3.121122031 | 0.00199815  | 0.043086705 |
| ZFP36    | -0.310056167 | 10.84934567 | -3.323412209 | 0.001012791 | 0.028850133 |
| SNAI2    | -0.300763446 | 8.612829659 | -3.422790505 | 0.000716468 | 0.023932065 |
| SULF2    | -0.296163892 | 8.590051766 | -3.554047421 | 0.000448015 | 0.018129329 |
| VEGFC    | -0.293860435 | 7.370367173 | -3.193706998 | 0.001571894 | 0.037168131 |
| CDH13    | -0.292922728 | 7.508853696 | -3.86508817  | 0.000139307 | 0.008902581 |
| DUSP14   | -0.29198077  | 9.205883494 | -3.722250598 | 0.000240511 | 0.012734349 |
| PRNP     | -0.289105611 | 10.72758798 | -3.796411553 | 0.000181504 | 0.010778865 |
| TCHH     | -0.287387721 | 6.946650248 | -3.189545925 | 0.001593852 | 0.037456376 |
| CAV2     | -0.286832418 | 8.425404105 | -3.612005149 | 0.000362513 | 0.016190049 |
| RNF217   | -0.285600708 | 7.464424334 | -4.590249553 | 6.80E-06    | 0.001419142 |
| LTBR     | -0.278881473 | 9.45863309  | -4.18588017  | 3.85E-05    | 0.004170266 |
| BTBD11   | -0.277098605 | 8.452520133 | -3.108936113 | 0.002079396 | 0.0442738   |
| HOXC13   | -0.274365882 | 7.402588929 | -3.782608092 | 0.000191331 | 0.01109263  |
| RRAS2    | -0.274213946 | 8.099666983 | -4.138090383 | 4.69E-05    | 0.00460036  |
| PNLIPRP3 | -0.273962649 | 6.812076704 | -3.274791843 | 0.001196147 | 0.031802072 |
| FAM83B   | -0.273798677 | 8.030679012 | -3.355877069 | 0.000905312 | 0.02720647  |
| CEBPB    | -0.273187742 | 11.2043226  | -3.752145186 | 0.000214826 | 0.011890084 |
| HSPH1    | -0.269947702 | 10.51062014 | -3.942395208 | 0.000102961 | 0.007621426 |
| ANKRD57  | -0.269728844 | 10.66783482 | -3.237736107 | 0.001356107 | 0.033976898 |
| MAGEA9   | -0.269155924 | 6.768468529 | -3.602922778 | 0.000374812 | 0.016416306 |
| MN1      | -0.268128619 | 7.748299541 | -3.483910573 | 0.000576774 | 0.020811935 |
| DYNC1H1  | -0.267172009 | 6.996447911 | -3.380338315 | 0.000831459 | 0.025841083 |
| RGS2     | -0.264877811 | 10.00901439 | -3.078795862 | 0.002293609 | 0.046803621 |
| TGFA     | -0.264097374 | 8.431403865 | -3.355548158 | 0.000906346 | 0.02720647  |
| SIRPA    | -0.262046215 | 8.340728397 | -4.153048029 | 4.41E-05    | 0.004445734 |
| COL28A1  | -0.261832783 | 6.790866793 | -4.52802925  | 8.96E-06    | 0.001682113 |
| CAP2     | -0.261760128 | 7.663679959 | -3.792056847 | 0.000184551 | 0.01084104  |
| CUTL1    | -0.259728175 | 8.95675171  | -3.246598276 | 0.00131614  | 0.033588331 |

|           |              |             |              |             |             |
|-----------|--------------|-------------|--------------|-------------|-------------|
| TPCN2     | -0.258947735 | 7.61911771  | -3.330859574 | 0.000987135 | 0.028420089 |
| ZDHHHC8   | -0.258013327 | 10.00326304 | -4.57733402  | 7.21E-06    | 0.00147403  |
| CD93      | -0.256954915 | 8.394663972 | -3.135659926 | 0.001905059 | 0.041818053 |
| CCDC86    | -0.254637187 | 8.167275352 | -4.734107243 | 3.56E-06    | 0.000943445 |
| GNG11     | -0.253837047 | 8.058470587 | -3.425655776 | 0.000709269 | 0.023829912 |
| PPP2R2C   | -0.253268049 | 7.627240911 | -3.246883458 | 0.001314873 | 0.033588331 |
| IRS1      | -0.252102129 | 7.493070221 | -3.51542815  | 0.000515131 | 0.01951548  |
| CCRN4L    | -0.251432472 | 7.78933416  | -3.430938207 | 0.000696173 | 0.023533849 |
| FJX1      | -0.246422819 | 7.885584997 | -3.461643033 | 0.000624417 | 0.022105331 |
| EFEMP1    | -0.245872553 | 8.012477648 | -3.164414352 | 0.001732622 | 0.039207944 |
| CTSL1     | -0.245359405 | 8.588260008 | -3.342842054 | 0.000947122 | 0.027822328 |
| KDEL2     | -0.244666678 | 9.494608299 | -4.063011405 | 6.36E-05    | 0.005548939 |
| OAF       | -0.243880386 | 8.368606444 | -3.780346164 | 0.000192988 | 0.011129992 |
| INHBB     | -0.240767384 | 7.145504853 | -3.62285888  | 0.000348313 | 0.015940668 |
| SEC61G    | -0.240092127 | 11.06831089 | -3.663836779 | 0.00029928  | 0.014442048 |
| SSFA2     | -0.239548559 | 7.627294454 | -3.892146927 | 0.000125387 | 0.008503463 |
| LAMB1     | -0.234158896 | 8.575643406 | -3.17789568  | 0.001656851 | 0.03832208  |
| MYO5A     | -0.232950678 | 7.640675278 | -4.027415749 | 7.34E-05    | 0.006206115 |
| GALNTL4   | -0.231174279 | 7.995138642 | -3.680018429 | 0.000281771 | 0.014135531 |
| PI15      | -0.230616705 | 7.142506447 | -3.376693442 | 0.000842095 | 0.025983148 |
| PROCR     | -0.229715517 | 7.532917548 | -3.822205302 | 0.000164406 | 0.009979277 |
| PAPPA     | -0.228251448 | 7.302799322 | -3.739468515 | 0.000225384 | 0.012197943 |
| FMNL2     | -0.227829661 | 7.998298022 | -3.987260042 | 8.62E-05    | 0.006838213 |
| TFAP2C    | -0.225032706 | 8.717877569 | -3.042088941 | 0.002581889 | 0.049940008 |
| AGPAT4    | -0.224016587 | 7.46770625  | -3.763956516 | 0.00020541  | 0.011543395 |
| GPR116    | -0.223040522 | 8.259783965 | -3.070842827 | 0.002353428 | 0.047485658 |
| EML1      | -0.21966413  | 7.3895142   | -3.997880261 | 8.26E-05    | 0.006675624 |
| DEGS1     | -0.219256525 | 9.073646059 | -3.376342829 | 0.000843125 | 0.025983148 |
| BCHE      | -0.217842452 | 6.810718695 | -3.16618629  | 0.001722484 | 0.03909931  |
| SLC3A2    | -0.21756295  | 8.060027301 | -4.303957336 | 2.35E-05    | 0.003005234 |
| ITGA6     | -0.216145063 | 7.759039226 | -3.462613511 | 0.000622266 | 0.022088935 |
| SVEP1     | -0.216073939 | 7.547325027 | -3.189682179 | 0.001593129 | 0.037456376 |
| TTYH3     | -0.21561026  | 8.713913308 | -3.407464558 | 0.00075615  | 0.024710055 |
| NT5C3     | -0.21109057  | 9.086876598 | -3.919319729 | 0.000112741 | 0.00796546  |
| LOC10013  | -0.210630235 | 7.085330894 | -5.487170125 | 9.44E-08    | 5.76E-05    |
| KRT9      | -0.209154065 | 6.939106116 | -3.29614455  | 0.00111212  | 0.030469592 |
| KLK9      | -0.206882482 | 6.72540255  | -3.101567923 | 0.002129988 | 0.044813576 |
| LAMC3     | -0.204968356 | 7.12591066  | -3.595151397 | 0.000385647 | 0.016615315 |
| COL12A1   | -0.201631542 | 7.425453052 | -3.662796541 | 0.00030044  | 0.014442048 |
| PTPLA     | -0.200721014 | 7.614952242 | -3.227937823 | 0.001401604 | 0.034760098 |
| TNFRSF1   | -0.199823874 | 9.387796153 | -4.073826651 | 6.09E-05    | 0.005375666 |
| PTGS1     | -0.198687605 | 7.515890849 | -3.138693576 | 0.001886146 | 0.041527346 |
| NAV1      | -0.198626503 | 7.499172207 | -3.608921521 | 0.000366646 | 0.016308318 |
| LOC72854  | -0.196085462 | 8.268315246 | -5.074506044 | 7.26E-07    | 0.000270375 |
| C10orf108 | -0.193447032 | 6.916197775 | -3.539780635 | 0.000471791 | 0.018611612 |
| DHRS7     | -0.192931389 | 9.629227027 | -3.261176335 | 0.001252766 | 0.032614967 |
| WDFY2     | -0.19023837  | 7.824392468 | -3.879402507 | 0.00013177  | 0.008741317 |
| C16orf57  | -0.189974043 | 8.482893319 | -3.736469427 | 0.000227953 | 0.012266244 |
| MPP6      | -0.189854415 | 7.176045281 | -3.878232775 | 0.000132372 | 0.008741317 |
| CHD7      | -0.189080817 | 8.326488778 | -3.736445246 | 0.000227974 | 0.012266244 |
| BZW2      | -0.188335187 | 9.520302254 | -3.758579803 | 0.000209647 | 0.011691789 |

|          |              |             |              |             |             |
|----------|--------------|-------------|--------------|-------------|-------------|
| RILPL1   | -0.186991222 | 8.602785934 | -4.035853352 | 7.10E-05    | 0.00602272  |
| KTN1     | -0.185529977 | 8.661247801 | -3.644794159 | 0.000321197 | 0.015210482 |
| UNC84A   | -0.184257019 | 8.887839744 | -3.398589414 | 0.000780059 | 0.025095509 |
| KIF5B    | -0.183837972 | 8.314861253 | -3.851847896 | 0.000146641 | 0.00917989  |
| STARD3N  | -0.183347783 | 7.532243356 | -3.799396242 | 0.000179443 | 0.01073549  |
| AGPAT9   | -0.182157294 | 7.315903592 | -3.069264051 | 0.002365473 | 0.047641187 |
| HSPA5    | -0.181343715 | 8.736945854 | -3.192248543 | 0.001579558 | 0.037200033 |
| LOC65051 | -0.180069987 | 7.469726749 | -3.400936328 | 0.000773669 | 0.025040788 |
| UPP1     | -0.179694642 | 8.145051667 | -3.119907918 | 0.002006111 | 0.043173639 |
| STRN3    | -0.179540977 | 8.532331618 | -3.284855634 | 0.001155835 | 0.031123969 |
| SPAG9    | -0.178735865 | 7.994687664 | -4.71333765  | 3.92E-06    | 0.00101237  |
| EGFR     | -0.177760275 | 7.231810325 | -3.74098245  | 0.000224098 | 0.012181382 |
| EIF3B    | -0.176890057 | 9.639535092 | -3.864443318 | 0.000139656 | 0.008902581 |
| KCNQ4    | -0.176637582 | 6.826285354 | -3.613770592 | 0.000360167 | 0.016183947 |
| TMED10F  | -0.175526581 | 10.83859623 | -3.223094525 | 0.001424612 | 0.035014549 |
| TBC1D16  | -0.175087282 | 7.598814482 | -3.736042249 | 0.000228321 | 0.012266244 |
| ZDHHC9   | -0.174819387 | 8.682904895 | -3.204520515 | 0.001516133 | 0.036358362 |
| RFTN2    | -0.174011135 | 7.126568717 | -3.240421417 | 0.001343879 | 0.033976898 |
| RRS1     | -0.173741926 | 7.994413974 | -3.704442721 | 0.000257161 | 0.013295545 |
| MEMO1    | -0.172956364 | 8.07321775  | -4.801601436 | 2.62E-06    | 0.000723965 |
| DRAP1    | -0.172772943 | 10.55275511 | -3.158391904 | 0.001767497 | 0.039914903 |
| EBPL     | -0.172729099 | 8.47901971  | -3.174088783 | 0.001677931 | 0.038631606 |
| RAB11FIF | -0.172637762 | 7.738268455 | -4.083148884 | 5.87E-05    | 0.005239691 |
| PANX1    | -0.172308171 | 7.470850201 | -3.328016409 | 0.000996857 | 0.028483673 |
| TMEM98   | -0.172104496 | 7.58247977  | -3.242362975 | 0.001335102 | 0.033953941 |
| HSP90AB  | -0.171027592 | 10.91093441 | -3.245137548 | 0.001322652 | 0.033715347 |
| C3orf26  | -0.170796134 | 8.214421309 | -3.745822911 | 0.000220032 | 0.012086891 |
| SBDS     | -0.169144613 | 8.936130315 | -3.488758509 | 0.000566862 | 0.020690478 |
| SYNCRIP  | -0.167180872 | 9.638218503 | -3.187743372 | 0.001603452 | 0.037582513 |
| GARS     | -0.166545869 | 10.371292   | -3.708114368 | 0.000253642 | 0.013144514 |
| FOXF2    | -0.166096014 | 7.004254394 | -3.874171268 | 0.000134479 | 0.008847023 |
| KHDC1L   | -0.16583756  | 6.704043822 | -3.794674158 | 0.000182714 | 0.010821481 |
| TTPAL    | -0.164029382 | 7.626004322 | -3.714048966 | 0.000248049 | 0.012977109 |
| NDEL1    | -0.163874854 | 8.737067547 | -3.193131552 | 0.001574914 | 0.037170332 |
| GOLGA7I  | -0.162665856 | 6.837523274 | -4.072423522 | 6.13E-05    | 0.005384633 |
| CSAG3A   | -0.162236784 | 6.631446751 | -3.934068122 | 0.000106394 | 0.007725808 |
| DCUN1D3  | -0.161936179 | 7.724127961 | -3.710706769 | 0.000251184 | 0.013047931 |
| C14orf37 | -0.161710185 | 6.971564385 | -3.391699145 | 0.000799105 | 0.025412709 |
| LOC72968 | -0.161340915 | 7.186328036 | -3.201459039 | 0.001531731 | 0.036543679 |
| DYNCH2   | -0.160727531 | 9.341089878 | -3.635961872 | 0.000331867 | 0.015581457 |
| DNM1L    | -0.159948871 | 7.965264628 | -4.09633571  | 5.56E-05    | 0.005048811 |
| EXOSC6   | -0.159329458 | 8.596889064 | -3.276825153 | 0.001187898 | 0.031707744 |
| RNF149   | -0.159128382 | 8.9157657   | -4.306662912 | 2.33E-05    | 0.002988454 |
| LOC38966 | -0.158177422 | 7.667818758 | -3.438851256 | 0.000676977 | 0.023170118 |
| HSPA12A  | -0.157989981 | 7.070397751 | -3.926234371 | 0.000109722 | 0.007853144 |
| ZAK      | -0.157933009 | 7.52643158  | -3.69891614  | 0.000262546 | 0.013447362 |
| NRP1     | -0.156812426 | 7.488769415 | -3.522681515 | 0.000501847 | 0.019210951 |
| NSMAF    | -0.156581007 | 8.855459615 | -3.552553329 | 0.000450451 | 0.018156921 |
| PGM3     | -0.156484956 | 7.617006964 | -4.100484225 | 5.47E-05    | 0.005043643 |
| RAB2A    | -0.156120174 | 8.374763906 | -3.520782237 | 0.000505294 | 0.019233981 |
| ACLY     | -0.155173764 | 9.13130864  | -3.763047151 | 0.000206121 | 0.011553794 |

|          |              |             |              |             |             |
|----------|--------------|-------------|--------------|-------------|-------------|
| SNX13    | -0.154742761 | 7.756065544 | -4.110601248 | 5.25E-05    | 0.004924133 |
| TMEM181  | -0.154534424 | 9.037400511 | -3.786198357 | 0.000188727 | 0.010970649 |
| STRAP    | -0.15441971  | 10.25509243 | -3.582708603 | 0.000403608 | 0.017087624 |
| CAMSAP   | -0.15302401  | 8.793035442 | -3.054079502 | 0.002484247 | 0.048912517 |
| STXBP5   | -0.152561548 | 7.707384753 | -3.112393347 | 0.002056041 | 0.044075511 |
| PPPDE2   | -0.152534257 | 8.009965535 | -3.353097074 | 0.000914082 | 0.027325368 |
| IDE      | -0.151395688 | 7.811226841 | -3.572696899 | 0.000418627 | 0.017454462 |
| LMTK2    | -0.149304324 | 7.074173945 | -4.015933785 | 7.69E-05    | 0.0063791   |
| COPS7A   | -0.148682944 | 9.780920174 | -3.607469168 | 0.000368608 | 0.016362452 |
| SPRYD3   | -0.147547902 | 8.032478071 | -4.285486938 | 2.54E-05    | 0.003121601 |
| SMOX     | -0.146955713 | 7.158292372 | -3.612195223 | 0.00036226  | 0.016190049 |
| ZNF426   | -0.145671072 | 7.011489829 | -3.167974457 | 0.001712307 | 0.038960921 |
| RSPH3    | -0.145179912 | 7.841465364 | -3.301404593 | 0.001092281 | 0.030141967 |
| WDR43    | -0.144751204 | 7.751577248 | -3.826992445 | 0.000161406 | 0.009934354 |
| PCDH21   | -0.144438812 | 6.81151764  | -3.226745051 | 0.001407238 | 0.034809879 |
| TAX1BP1  | -0.144102727 | 9.657852769 | -3.969654045 | 9.24E-05    | 0.007127413 |
| LAMP1    | -0.142817422 | 10.99826507 | -3.305591155 | 0.001076726 | 0.030023983 |
| LOC72855 | -0.142616653 | 8.888267434 | -3.432100845 | 0.000693321 | 0.023473555 |
| PFKM     | -0.142413353 | 8.020296168 | -3.314513399 | 0.001044261 | 0.02934214  |
| GLG1     | -0.142336685 | 10.12208003 | -3.050082183 | 0.002516414 | 0.04927858  |
| PCNX     | -0.141797871 | 8.702655852 | -3.077141021 | 0.002305939 | 0.046889602 |
| OSMR     | -0.141653952 | 7.061374851 | -3.41743337  | 0.000730112 | 0.024160782 |
| SNORA8   | -0.141528688 | 7.077250655 | -3.645706316 | 0.000320114 | 0.015191919 |
| CSNK1D   | -0.141505433 | 8.289021662 | -3.550600145 | 0.000453654 | 0.018156921 |
| C7orf30  | -0.141439471 | 9.772457516 | -3.669987484 | 0.000292508 | 0.01437869  |
| EXT2     | -0.140527997 | 7.688725727 | -3.199569142 | 0.001541434 | 0.036695481 |
| LOC64275 | -0.140363476 | 8.672552999 | -3.835237786 | 0.000156358 | 0.009677923 |
| RPF2     | -0.139367287 | 9.292711532 | -3.170602363 | 0.001697453 | 0.038824799 |
| MTDH     | -0.138983526 | 9.788799828 | -3.153249046 | 0.00179779  | 0.040226916 |
| PWP1     | -0.138835486 | 9.312020586 | -4.481411526 | 1.10E-05    | 0.001915521 |
| LOC10013 | -0.138764876 | 7.614747391 | -3.503927901 | 0.000536871 | 0.020096525 |
| PDZD8    | -0.138457337 | 7.693643476 | -3.391262119 | 0.000800327 | 0.025412709 |
| CYB5R3   | -0.138119662 | 9.954494847 | -3.42851278  | 0.000702157 | 0.0236997   |
| AVL9     | -0.137949117 | 7.02464855  | -4.540225587 | 8.49E-06    | 0.001607981 |
| PMM2     | -0.137849158 | 8.14252565  | -3.566120107 | 0.000428778 | 0.017643328 |
| RSL1D1   | -0.137796292 | 8.495656563 | -3.069300861 | 0.002365191 | 0.047641187 |
| LOC65329 | -0.137760452 | 6.73508634  | -3.521136926 | 0.000504649 | 0.019233981 |
| SBDSP    | -0.136852837 | 7.79941791  | -3.298499369 | 0.001103197 | 0.030338614 |
| LTV1     | -0.136688588 | 8.898979086 | -3.774836935 | 0.000197082 | 0.011257239 |
| GFPT1    | -0.136559652 | 8.477980944 | -3.074700997 | 0.002324232 | 0.047112864 |
| LOC72992 | -0.136533402 | 6.770395145 | -3.859756611 | 0.000142218 | 0.00897974  |
| KLHL36   | -0.135634951 | 7.988256756 | -3.585044989 | 0.000400176 | 0.016998119 |
| CSNK2A2  | -0.135538572 | 7.95491874  | -3.943483172 | 0.000102521 | 0.007621426 |
| GALNS    | -0.134789074 | 7.162270281 | -4.636581448 | 5.53E-06    | 0.001240812 |
| POP1     | -0.134772649 | 7.109780421 | -3.699242947 | 0.000262224 | 0.013447362 |
| RUNDC3L  | -0.134249772 | 6.597639578 | -3.1513829   | 0.0018089   | 0.040311317 |
| TOP1MT   | -0.134156923 | 7.313198977 | -3.79332602  | 0.000183658 | 0.010830997 |
| PNO1     | -0.134098159 | 8.020487095 | -3.38753618  | 0.000810822 | 0.0254881   |
| C16orf87 | -0.133838561 | 7.570299403 | -3.938959297 | 0.000104365 | 0.007621426 |
| TMED2    | -0.133718131 | 10.25661344 | -3.338930981 | 0.000960013 | 0.028051008 |
| UBE2F    | -0.13371637  | 9.477481659 | -3.049196248 | 0.002523595 | 0.049333595 |

|           |              |             |              |             |             |
|-----------|--------------|-------------|--------------|-------------|-------------|
| ARIH1     | -0.133037958 | 7.702627471 | -3.662272267 | 0.000301027 | 0.014442048 |
| GTF2F2    | -0.132809943 | 9.339377962 | -3.18246482  | 0.001631873 | 0.03792849  |
| ZNF319    | -0.132700204 | 7.650280611 | -3.510994879 | 0.000523412 | 0.019795065 |
| CSAG3B    | -0.132372326 | 6.517534695 | -3.454139397 | 0.000641284 | 0.022315256 |
| E2F4      | -0.130517378 | 8.814817842 | -3.267744145 | 0.001225151 | 0.032169986 |
| CHST2     | -0.130180068 | 6.891227478 | -3.301935063 | 0.001090298 | 0.030141967 |
| HRSP12    | -0.129210589 | 7.560764984 | -3.171785079 | 0.001690807 | 0.038780903 |
| RBMS1     | -0.12915217  | 7.838410319 | -3.540823432 | 0.000470014 | 0.018574851 |
| PIP4K2C   | -0.128653859 | 7.991842605 | -3.401733273 | 0.00077151  | 0.025040461 |
| FBXO28    | -0.128520358 | 8.269103743 | -3.23823076  | 0.001353847 | 0.033976898 |
| GPATCH2   | -0.128512051 | 7.32200569  | -3.521503591 | 0.000503982 | 0.019233981 |
| LOC64517  | -0.128199893 | 7.469540188 | -3.923243089 | 0.000111018 | 0.00787265  |
| LOC28475  | -0.128183645 | 6.587241621 | -3.113658739 | 0.002047554 | 0.043936433 |
| KLF10     | -0.127962261 | 6.95338294  | -3.295770281 | 0.001113544 | 0.030470622 |
| FEZ2      | -0.127813186 | 9.181709943 | -3.23814757  | 0.001354227 | 0.033976898 |
| TPD52L2   | -0.127773388 | 8.988892526 | -3.310724932 | 0.001057933 | 0.029688335 |
| AUP1      | -0.127722561 | 8.54324474  | -3.476325173 | 0.000592607 | 0.021276729 |
| UBR3      | -0.127707685 | 7.713258995 | -4.162141686 | 4.25E-05    | 0.004342387 |
| ARCN1     | -0.126820313 | 9.787091983 | -3.26608438  | 0.001232075 | 0.032267455 |
| KIF7      | -0.125601255 | 6.787910984 | -3.551936512 | 0.00045146  | 0.018156921 |
| ZNF650    | -0.125324319 | 7.627347842 | -3.939149846 | 0.000104286 | 0.007621426 |
| DDX10     | -0.125005196 | 8.270948925 | -3.065920758 | 0.002391166 | 0.047829454 |
| NUPL2     | -0.125004381 | 8.443335689 | -3.18227037  | 0.001632929 | 0.03792849  |
| LCLAT1    | -0.124611273 | 8.088672064 | -3.187575165 | 0.001604351 | 0.037582513 |
| PEAR1     | -0.124423338 | 6.78364864  | -3.66752568  | 0.000295201 | 0.014414339 |
| SMTN      | -0.124250457 | 6.940702016 | -3.317694255 | 0.001032909 | 0.029185086 |
| SHC1      | -0.123541297 | 8.276718833 | -3.578439443 | 0.00040995  | 0.017289483 |
| CCNC      | -0.123411087 | 7.830992578 | -3.057729516 | 0.002455206 | 0.048602022 |
| C7orf42   | -0.123379587 | 8.093596909 | -3.491509979 | 0.000561308 | 0.020548    |
| CREB5     | -0.123164293 | 6.737927718 | -4.588861248 | 6.85E-06    | 0.001419142 |
| DOK4      | -0.123130138 | 7.215240409 | -3.099274154 | 0.002145968 | 0.044907949 |
| RTN4      | -0.122418929 | 8.442008387 | -3.893519421 | 0.000124717 | 0.008499431 |
| RALGAPI   | -0.122249689 | 7.743555483 | -3.637133255 | 0.000330433 | 0.015547346 |
| PREP      | -0.122133536 | 8.350533476 | -3.099676668 | 0.002143155 | 0.044907949 |
| GNA12     | -0.121768371 | 7.14248533  | -4.419804498 | 1.43E-05    | 0.002251854 |
| TNS4      | -0.121748792 | 6.931537381 | -3.137066485 | 0.001896269 | 0.041708419 |
| OSBPL5    | -0.121674573 | 7.489279352 | -3.192253599 | 0.001579531 | 0.037200033 |
| DEXI      | -0.121613298 | 8.685851439 | -3.21331399  | 0.001472146 | 0.035838283 |
| C14orf100 | -0.120980739 | 8.187457022 | -3.095780724 | 0.002170518 | 0.045177126 |
| C14orf149 | -0.120852075 | 7.00286407  | -3.349087396 | 0.00092687  | 0.02748785  |
| LOC10012  | -0.120830678 | 7.12144495  | -3.457732614 | 0.000633155 | 0.02220925  |
| MRPL32    | -0.120272187 | 9.661695458 | -3.09597766  | 0.002169127 | 0.045177126 |
| MRPL19    | -0.119710841 | 8.602478456 | -3.078009005 | 0.002299464 | 0.046826814 |
| TMEM150   | -0.119234353 | 7.597968551 | -3.623458609 | 0.000347544 | 0.015940668 |
| SNORA18   | -0.119012263 | 6.992966243 | -3.396944227 | 0.000784568 | 0.025203659 |
| CD276     | -0.118592788 | 7.42106852  | -3.047451111 | 0.002537796 | 0.049444144 |
| TAF1D     | -0.118529223 | 7.299335163 | -3.066558387 | 0.002386246 | 0.047829454 |
| LOC64955  | -0.118291249 | 8.379533393 | -3.090331647 | 0.002209328 | 0.045596796 |
| ETNK1     | -0.118271679 | 7.268495499 | -3.284298774 | 0.001158032 | 0.031144965 |
| UBR1      | -0.118000555 | 6.816741135 | -3.965248229 | 9.41E-05    | 0.007227535 |
| LOC65281  | -0.117609652 | 6.734556245 | -3.866724162 | 0.000138426 | 0.008902581 |

|          |              |             |              |             |             |
|----------|--------------|-------------|--------------|-------------|-------------|
| GTF2H3   | -0.1175649   | 7.484982926 | -3.395883264 | 0.000787488 | 0.025223725 |
| CRIM1    | -0.115954983 | 6.747459766 | -4.611643481 | 6.19E-06    | 0.001319697 |
| LRRC41   | -0.115950947 | 8.412387198 | -3.055969649 | 0.002469169 | 0.048746681 |
| LOC28592 | -0.115792501 | 6.639433127 | -3.793038049 | 0.00018386  | 0.010830997 |
| ARFGEF2  | -0.115505699 | 7.252785525 | -3.846476804 | 0.000149719 | 0.009345944 |
| SCYL1    | -0.113755298 | 8.807302433 | -3.273887484 | 0.001199832 | 0.031802072 |
| ZNF419   | -0.112832739 | 7.830443625 | -3.249332059 | 0.001304034 | 0.033434699 |
| TM4SF18  | -0.112767967 | 6.881558278 | -3.099816884 | 0.002142177 | 0.044907949 |
| PIGT     | -0.112735686 | 8.272163498 | -3.047849573 | 0.002534547 | 0.049444144 |
| NUDT15   | -0.111600164 | 7.553211098 | -3.522750317 | 0.000501723 | 0.019210951 |
| CHORDC   | -0.110886014 | 7.102244119 | -3.659154713 | 0.000304535 | 0.014578521 |
| TOR1AIP2 | -0.110503375 | 7.148026777 | -3.259815462 | 0.00125856  | 0.032651514 |
| LOC72921 | -0.110393729 | 7.902055907 | -3.213180269 | 0.001472806 | 0.035838283 |
| LOC65302 | -0.110380166 | 6.648473316 | -3.574978278 | 0.000415159 | 0.017408967 |
| ATF2     | -0.108862103 | 7.083718488 | -4.085085452 | 5.82E-05    | 0.005219946 |
| AHR      | -0.108229525 | 9.471173589 | -3.148536447 | 0.001825969 | 0.040613722 |
| THSD1    | -0.108149445 | 6.705405448 | -3.432352247 | 0.000692706 | 0.023473555 |
| PES1     | -0.107940139 | 7.526347721 | -3.439657805 | 0.000675048 | 0.023140157 |
| GGCX     | -0.107934894 | 7.210428457 | -3.825407576 | 0.000162393 | 0.009967223 |
| LOC40021 | -0.107345437 | 6.701662962 | -3.664609377 | 0.000298422 | 0.014442048 |
| TRIP11   | -0.107274847 | 8.213099601 | -3.07873447  | 0.002294065 | 0.046803621 |
| SERINC3  | -0.107153127 | 7.857129345 | -3.829208793 | 0.000160034 | 0.0098776   |
| GSPT1    | -0.106768085 | 10.86161076 | -3.128373413 | 0.001951205 | 0.042449329 |
| TRIO     | -0.106281612 | 7.134982959 | -3.042829121 | 0.002575761 | 0.04986537  |
| C1RL     | -0.106023415 | 7.329156305 | -3.427026367 | 0.000705849 | 0.023787757 |
| SLC35F3  | -0.105054575 | 6.567370829 | -4.697016412 | 4.22E-06    | 0.001064955 |
| FAM10A4  | -0.103954686 | 8.308132309 | -3.151692719 | 0.001807051 | 0.040310997 |
| RBM9     | -0.101783459 | 7.745663027 | -3.394102081 | 0.000792414 | 0.025307721 |
| STK31    | -0.101632849 | 6.603593882 | -3.44914799  | 0.000652739 | 0.022515919 |
| PUS1     | -0.101490962 | 8.223918728 | -3.260804253 | 0.001254348 | 0.032617499 |
| SELI     | -0.099592111 | 7.406665424 | -3.05485385  | 0.00247806  | 0.048834922 |
| COPA     | -0.099314403 | 9.787528225 | -3.067279164 | 0.002380696 | 0.047829454 |
| APH1B    | -0.098395387 | 7.178288553 | -3.078261976 | 0.00229758  | 0.046826814 |
| METTL1   | -0.097187156 | 7.936537303 | -3.364512401 | 0.000878569 | 0.026661454 |
| DLX1     | -0.096646184 | 6.68729875  | -3.622168365 | 0.000349201 | 0.015940668 |
| TLL1     | -0.095423088 | 6.627664966 | -3.131998345 | 0.001928121 | 0.042113912 |
| CSAG2    | -0.094982855 | 6.41355672  | -3.34841504  | 0.000929031 | 0.02748785  |
| C2orf56  | -0.09463645  | 7.45220866  | -4.115354843 | 5.15E-05    | 0.004853234 |
| AGAP3    | -0.094354535 | 6.984944277 | -3.67720369  | 0.000284746 | 0.014219827 |
| TRAF3IP2 | -0.093354488 | 8.072161334 | -3.054850857 | 0.002478084 | 0.048834922 |
| SH3RF3   | -0.093016308 | 6.734502061 | -3.18059064  | 0.001642076 | 0.038060482 |
| PTPN14   | -0.092067606 | 6.697191786 | -3.441983326 | 0.000669517 | 0.022986392 |
| SRPK2    | -0.091972688 | 6.930441856 | -3.536597098 | 0.000477256 | 0.018759828 |
| SUGT1    | -0.091179953 | 7.474147463 | -3.097227019 | 0.002160323 | 0.045122402 |
| CYCSL1   | -0.090988541 | 8.295752376 | -3.203600843 | 0.001520803 | 0.03640154  |
| KIAA1429 | -0.090342088 | 7.458546862 | -3.254417146 | 0.001281789 | 0.033135005 |
| LOC64292 | -0.089615244 | 6.524182486 | -3.10989614  | 0.002072886 | 0.0442738   |
| UBE2O    | -0.089590206 | 7.282253425 | -3.102291705 | 0.002124968 | 0.044813576 |
| PAFAH1E  | -0.088930688 | 6.784138236 | -3.454999508 | 0.000639329 | 0.022310752 |
| SLC44A5  | -0.087800969 | 6.597835292 | -3.167880504 | 0.001712841 | 0.038960921 |
| SPRY4    | -0.087740715 | 6.857935751 | -3.374373083 | 0.000848932 | 0.026073793 |

|          |              |             |              |             |             |
|----------|--------------|-------------|--------------|-------------|-------------|
| STRN     | -0.08713395  | 7.196080407 | -3.173101079 | 0.00168344  | 0.03869271  |
| MUM1L1   | -0.086835513 | 6.473716131 | -3.420677595 | 0.000721821 | 0.023994813 |
| PLCH1    | -0.085838598 | 6.518096246 | -3.103006524 | 0.002120022 | 0.044791572 |
| LOC73027 | -0.085432288 | 6.599844473 | -3.404479107 | 0.000764115 | 0.024873935 |
| RAG1     | -0.085373767 | 6.569903144 | -3.916226568 | 0.000114117 | 0.008011159 |
| LOC40001 | -0.084820154 | 7.896796386 | -3.651955397 | 0.000312784 | 0.014908444 |
| LOC10021 | -0.084743362 | 6.525083417 | -3.196066072 | 0.00155957  | 0.037006937 |
| GABRR1   | -0.083637463 | 6.52113568  | -3.330084259 | 0.000989777 | 0.028420089 |
| ROBO4    | -0.083338511 | 6.619063556 | -4.266568559 | 2.75E-05    | 0.003270274 |
| MAPKAP   | -0.083162922 | 8.362894953 | -3.104191554 | 0.002111844 | 0.044710029 |
| LOC65253 | -0.083043932 | 6.60223008  | -3.365715937 | 0.000874901 | 0.02658948  |
| LOC73177 | -0.082924649 | 7.508232264 | -3.252616746 | 0.001289624 | 0.033197423 |
| LOC10013 | -0.081542978 | 6.582436243 | -3.545479931 | 0.000462154 | 0.01839659  |
| ST6GALN  | -0.079877109 | 6.464382583 | -3.402474092 | 0.000769508 | 0.02501244  |
| SSB      | -0.079718447 | 7.927063248 | -3.315263043 | 0.001041576 | 0.029304147 |
| PSMD11   | -0.079692766 | 7.257590343 | -3.049819893 | 0.002518538 | 0.04927858  |
| LOC10013 | -0.079106136 | 6.614258362 | -3.2999888   | 0.001097588 | 0.030222181 |
| BAALC    | -0.078763632 | 6.529241413 | -3.264070664 | 0.001240526 | 0.032450092 |
| COL13A1  | -0.077634024 | 6.698902724 | -3.329593121 | 0.000991455 | 0.028420089 |
| YIPF4    | -0.077297763 | 7.663016393 | -3.461497572 | 0.00062474  | 0.022105331 |
| HERPUD2  | -0.077215077 | 7.0983963   | -4.076004865 | 6.04E-05    | 0.005371554 |
| FBXO11   | -0.07698488  | 7.882346067 | -3.462940443 | 0.000621543 | 0.022088935 |
| CYTH3    | -0.076632964 | 7.088968914 | -3.329739945 | 0.000990953 | 0.028420089 |
| SCAND3   | -0.076340448 | 6.525943943 | -3.505397839 | 0.000534045 | 0.02005909  |
| HK1      | -0.075951057 | 8.857005472 | -3.047119605 | 0.002540501 | 0.049444144 |
| FAM126A  | -0.075688055 | 6.716513562 | -3.622724476 | 0.000348486 | 0.015940668 |
| SPATA7   | -0.073631032 | 6.995609271 | -3.073031832 | 0.002336822 | 0.047280837 |
| MXRA7    | -0.071624095 | 6.945489625 | -3.082415977 | 0.002266847 | 0.046451365 |
| ATP6V1H  | -0.07110271  | 7.356455539 | -3.148476103 | 0.001826332 | 0.040613722 |
| LYST     | -0.071000105 | 6.940780371 | -3.676332894 | 0.000285672 | 0.014233732 |
| INPP5A   | -0.070473683 | 7.102409615 | -3.95803398  | 9.68E-05    | 0.007348516 |
| LOC72881 | -0.067391319 | 6.497230076 | -3.43785378  | 0.000679369 | 0.023172955 |
| DDX52    | -0.065161776 | 7.609496165 | -3.064376794 | 0.002403118 | 0.047829454 |
| LOC64481 | -0.065142501 | 6.694245235 | -3.248072488 | 0.001309599 | 0.033499207 |
| AADACL   | -0.063985146 | 6.527879183 | -3.208089535 | 0.001498135 | 0.036214004 |
| TBX1     | -0.063915172 | 6.685020295 | -3.389529396 | 0.000805192 | 0.025420229 |
| DEFB126  | -0.063106877 | 6.370582087 | -3.339731179 | 0.000957362 | 0.028010804 |
| LOC10013 | -0.06276154  | 6.583126822 | -3.409796342 | 0.000749983 | 0.024610007 |
| GABPB1   | -0.062597952 | 6.854591461 | -3.092842315 | 0.002191367 | 0.045382575 |
| SEC15L2  | -0.060327486 | 6.633316466 | -3.457863029 | 0.000632861 | 0.02220925  |
| LOC65353 | -0.059384137 | 6.891108522 | -3.104134213 | 0.002112239 | 0.044710029 |
| LOC72836 | -0.059215867 | 6.605216814 | -3.525856209 | 0.000496134 | 0.019210951 |
| SLCO1A2  | -0.058207881 | 6.442563994 | -3.316244014 | 0.001038071 | 0.029242984 |
| R3HDM2   | -0.056790168 | 6.890308966 | -3.524583853 | 0.000498417 | 0.019210951 |
| RPGR     | -0.055836924 | 6.850355754 | -3.347768037 | 0.000931115 | 0.02748785  |
| C3orf36  | -0.055333228 | 6.640676976 | -3.352508276 | 0.00091595  | 0.027325368 |
| SNORD12  | -0.054802654 | 6.596630807 | -3.165237333 | 0.001727907 | 0.039141538 |
| NAP1L2   | -0.052232489 | 6.522002783 | -3.380867485 | 0.000829925 | 0.02582995  |
| C22orf9  | -0.04788332  | 6.691144036 | -3.347498983 | 0.000931982 | 0.02748785  |
| NR2E3    | -0.046709729 | 6.365947108 | -3.524403203 | 0.000498741 | 0.019210951 |
| SLC35E4  | -0.042574383 | 6.470132198 | -3.605228276 | 0.000371654 | 0.01641343  |



|          |              |             |              |             |             |
|----------|--------------|-------------|--------------|-------------|-------------|
| FKBP9    | -0.041029669 | 6.493040997 | -3.141836317 | 0.001866736 | 0.041265382 |
| H2BFWT   | -0.039755952 | 6.339129834 | -3.379571431 | 0.000833686 | 0.025873713 |
| LOC64497 | -0.037333217 | 6.515127138 | -3.147178325 | 0.001834165 | 0.040709208 |
| LOC33986 | -0.033801673 | 6.374714726 | -3.056448159 | 0.002465365 | 0.048746681 |
| TBRG1    | -0.033537958 | 6.487555082 | -3.454843346 | 0.000639684 | 0.022310752 |
| LOC39975 | -0.033137899 | 6.410102462 | -3.620657165 | 0.000351151 | 0.015941807 |
| LOC10013 | -0.026088832 | 6.425393118 | -3.095849767 | 0.00217003  | 0.045177126 |
| ZMAT1    | 0.025459526  | 6.394749644 | 3.65718097   | 0.000306776 | 0.014653869 |
| ASCL3    | 0.025505499  | 6.373765145 | 3.063590607  | 0.002409225 | 0.047907609 |
| CDKN2C   | 0.028452942  | 6.460698896 | 3.070879952  | 0.002353146 | 0.047485658 |
| WNK3     | 0.028496489  | 6.440189625 | 3.442787853  | 0.000667613 | 0.022956898 |
| FLJ16734 | 0.030030174  | 6.386035813 | 3.504277888  | 0.000536197 | 0.020096525 |
| CCDC155  | 0.030302532  | 6.394599216 | 3.509658764  | 0.000525932 | 0.019822138 |
| MIR488   | 0.030935691  | 6.473905384 | 3.529075117  | 0.000490405 | 0.019105779 |
| ZNF667   | 0.031063817  | 6.459754376 | 3.4911542    | 0.000562024 | 0.020548    |
| GLYAT    | 0.032091625  | 6.425260513 | 4.055188803  | 6.57E-05    | 0.005652985 |
| NUDT6    | 0.03418221   | 6.555363437 | 3.495166478  | 0.000554007 | 0.020393018 |
| DDX25    | 0.034307023  | 6.377402565 | 3.452401168  | 0.000645252 | 0.022362964 |
| MIR1979  | 0.034325172  | 6.510794949 | 3.169749498  | 0.001702261 | 0.03888127  |
| NEURL    | 0.035750512  | 6.348648279 | 4.46175858   | 1.20E-05    | 0.002006922 |
| TLX3     | 0.035757151  | 6.390848899 | 3.272742662  | 0.001204513 | 0.031849304 |
| LOC72948 | 0.03593853   | 6.501744778 | 3.278312379  | 0.001181898 | 0.031631978 |
| SENP1    | 0.035975875  | 6.492807205 | 3.273996308  | 0.001199388 | 0.031802072 |
| IGSF5    | 0.037249713  | 6.346540753 | 3.215480968  | 0.00146149  | 0.035641853 |
| N4BP3    | 0.037367686  | 6.381087119 | 3.389952584  | 0.000804001 | 0.025419163 |
| PRR12    | 0.037698886  | 6.533777236 | 3.550931448  | 0.00045311  | 0.018156921 |
| ZNF580   | 0.038534882  | 6.855136119 | 3.243881272  | 0.001328276 | 0.033819473 |
| SMAD2    | 0.038578295  | 6.678520793 | 3.305002958  | 0.001078899 | 0.030036156 |
| HESX1    | 0.038598861  | 6.392888802 | 3.252474117  | 0.001290247 | 0.033197423 |
| GBX1     | 0.038714572  | 6.384550037 | 3.895153398  | 0.000123924 | 0.008492826 |
| LOC64270 | 0.040879827  | 6.408279745 | 3.178008656  | 0.001656229 | 0.03832208  |
| ZNF571   | 0.04115884   | 6.593205509 | 3.289897902  | 0.001136116 | 0.030743679 |
| LOC72915 | 0.041434281  | 6.508038431 | 3.079444211  | 0.002288795 | 0.046782965 |
| LOC25455 | 0.041815527  | 6.391813131 | 4.948159051  | 1.32E-06    | 0.000427626 |
| CD8B     | 0.042252696  | 6.403117672 | 3.092176305  | 0.002196119 | 0.045438148 |
| RIBC2    | 0.042446672  | 6.31316584  | 4.458759793  | 1.21E-05    | 0.002017829 |
| LOC72888 | 0.042580685  | 6.439267721 | 3.204852633  | 0.00151445  | 0.036358362 |
| BAT4     | 0.043247298  | 6.512816256 | 3.543726446  | 0.000465099 | 0.018446986 |
| NFATC2II | 0.043255204  | 7.039922836 | 3.317193946  | 0.001034687 | 0.029185086 |
| CPEB1    | 0.044008918  | 6.378147072 | 4.397983647  | 1.58E-05    | 0.002371944 |
| FLJ16793 | 0.044126592  | 6.480381367 | 3.262754307  | 0.001246079 | 0.032520148 |
| UBL7     | 0.044233903  | 6.895990188 | 3.10198891   | 0.002127067 | 0.044813576 |
| ZNF414   | 0.044298212  | 6.60157817  | 3.584673513  | 0.00040072  | 0.016998119 |
| LOC73108 | 0.044448038  | 6.386090339 | 3.666271223  | 0.000296582 | 0.014442048 |
| FLJ37453 | 0.044511231  | 6.437407562 | 4.440880437  | 1.31E-05    | 0.002086213 |
| PCLO     | 0.04474392   | 6.448390471 | 3.154400407  | 0.001790966 | 0.040197041 |
| GIPC2    | 0.045095954  | 6.399855344 | 3.570829188  | 0.000421487 | 0.017507242 |
| PRSS36   | 0.045266942  | 6.532308119 | 3.980919453  | 8.84E-05    | 0.006953671 |
| NCR3     | 0.045754523  | 6.336244272 | 3.650070554  | 0.000314978 | 0.014980528 |
| GRK6     | 0.046377206  | 6.594377362 | 3.810843948  | 0.00017174  | 0.010367173 |
| TTLL3    | 0.04657065   | 6.711691189 | 3.290605508  | 0.001133373 | 0.030740308 |

|          |             |             |             |             |             |
|----------|-------------|-------------|-------------|-------------|-------------|
| RAB37    | 0.047227239 | 6.510310516 | 3.218948808 | 0.001444584 | 0.035337772 |
| PDE6B    | 0.047428388 | 6.440151976 | 3.293148195 | 0.001123571 | 0.030559002 |
| ZNF519   | 0.047912425 | 6.503584663 | 3.168066582 | 0.001711785 | 0.038960921 |
| GZMM     | 0.048691143 | 6.465115917 | 3.302109235 | 0.001089648 | 0.030141967 |
| ICAM4    | 0.048799244 | 6.475798363 | 4.287119695 | 2.53E-05    | 0.003121601 |
| KIF24    | 0.049014133 | 6.564773074 | 3.153723045 | 0.001794978 | 0.040204938 |
| SMC1A    | 0.049097524 | 6.54652495  | 3.257699888 | 0.001267617 | 0.032807229 |
| ONECUT2  | 0.049313032 | 6.473691914 | 3.26273419  | 0.001246164 | 0.032520148 |
| GRAP2    | 0.049371965 | 6.36983173  | 3.6141436   | 0.000359673 | 0.016183947 |
| PRELID2  | 0.049482185 | 6.388134285 | 3.791396398 | 0.000185018 | 0.01084104  |
| DTNBP1   | 0.049948807 | 6.637547679 | 3.340508029 | 0.000954795 | 0.027972949 |
| PRAM1    | 0.050587085 | 6.402752779 | 3.569444977 | 0.000423618 | 0.017562557 |
| CIT      | 0.051280849 | 6.485547187 | 3.322964868 | 0.001014352 | 0.028850133 |
| CTSE     | 0.051826931 | 6.444874587 | 3.291025417 | 0.001131749 | 0.030739089 |
| PSTK     | 0.051939501 | 6.715476531 | 3.175584671 | 0.001669618 | 0.038536254 |
| ZBP2     | 0.05198452  | 6.359238364 | 5.766830799 | 2.22E-08    | 1.87E-05    |
| LOC10012 | 0.05200109  | 6.500359908 | 3.322798047 | 0.001014934 | 0.028850133 |
| DHFR     | 0.052959808 | 6.607587572 | 3.239699568 | 0.001347156 | 0.033976898 |
| ECE1     | 0.053207602 | 6.53726174  | 3.334061509 | 0.000976291 | 0.028365183 |
| LOC72959 | 0.053340313 | 6.591559459 | 3.526258249 | 0.000495415 | 0.019210951 |
| LIPE     | 0.053542382 | 6.516947156 | 3.377619849 | 0.00083938  | 0.025977031 |
| EFCAB7   | 0.053896295 | 6.71214466  | 3.048065188 | 0.002532791 | 0.049444144 |
| CNTD1    | 0.054224097 | 6.373696327 | 4.646695408 | 5.29E-06    | 0.001203451 |
| WDHD1    | 0.054308405 | 6.683614467 | 3.119552356 | 0.002008448 | 0.043181642 |
| IKZF4    | 0.05432242  | 6.700956371 | 3.359455618 | 0.000894139 | 0.02698752  |
| LCK      | 0.054376484 | 6.578581351 | 3.293107234 | 0.001123728 | 0.030559002 |
| TBC1D17  | 0.05453717  | 6.583367342 | 3.238059261 | 0.00135463  | 0.033976898 |
| CASP9    | 0.054539985 | 6.874014977 | 3.319243729 | 0.001027421 | 0.02912971  |
| FANCC    | 0.054653009 | 6.550097206 | 3.202869035 | 0.001524529 | 0.036411388 |
| RAB33A   | 0.05500716  | 6.492726588 | 3.166629224 | 0.001719958 | 0.039082349 |
| MIER1    | 0.05535882  | 7.235297382 | 3.349193519 | 0.00092653  | 0.02748785  |
| LOC64874 | 0.05550145  | 6.55962916  | 3.199721318 | 0.001540651 | 0.036695481 |
| POGZ     | 0.055544632 | 6.731309085 | 3.220646115 | 0.001436376 | 0.035185616 |
| S100BPB  | 0.055731547 | 7.251947257 | 3.290290866 | 0.001134592 | 0.030740308 |
| TMEM129  | 0.055807767 | 6.699911009 | 3.251239062 | 0.00129565  | 0.033297449 |
| ESCO2    | 0.056402638 | 6.493261942 | 3.157140051 | 0.001774827 | 0.040017302 |
| ZFR2     | 0.056787105 | 6.433293813 | 4.629351854 | 5.72E-06    | 0.001268653 |
| HMSD     | 0.056966745 | 6.387041159 | 3.748944763 | 0.000217446 | 0.012004893 |
| HAUS6    | 0.05797838  | 6.585261667 | 3.238757357 | 0.001351445 | 0.033976898 |
| TOE1     | 0.058097879 | 6.740705897 | 3.318667495 | 0.001029459 | 0.029149874 |
| FLJ46380 | 0.058360533 | 6.545145101 | 3.181140689 | 0.001639076 | 0.038031053 |
| USP4     | 0.058466945 | 6.985643886 | 3.437498239 | 0.000680224 | 0.023172955 |
| SASS6    | 0.058882425 | 6.946266002 | 3.074983401 | 0.002322108 | 0.047112864 |
| C10orf75 | 0.059282866 | 6.606391655 | 3.293304936 | 0.001122969 | 0.030559002 |
| CNTLN    | 0.059416229 | 6.615305321 | 3.560816633 | 0.000437131 | 0.017863091 |
| KIAA2022 | 0.059416915 | 6.400336523 | 4.205373057 | 3.55E-05    | 0.00388523  |
| FLJ21687 | 0.059490905 | 6.604789974 | 3.043558252 | 0.002569737 | 0.049795306 |
| SAMD3    | 0.059691709 | 6.485467835 | 3.294285891 | 0.00111921  | 0.030559002 |
| KATNALB  | 0.059871206 | 6.490893125 | 3.079569215 | 0.002287868 | 0.046782965 |
| SLC25A34 | 0.060099094 | 6.504593875 | 3.398839643 | 0.000779375 | 0.025095509 |
| LOC34027 | 0.060598663 | 6.537260073 | 3.452835156 | 0.000644259 | 0.022362964 |

|          |             |             |             |             |             |
|----------|-------------|-------------|-------------|-------------|-------------|
| PIK3R3   | 0.060981971 | 6.565444848 | 3.800091807 | 0.000178965 | 0.01073549  |
| LOC64321 | 0.061706378 | 6.413827292 | 4.665991921 | 4.85E-06    | 0.001158319 |
| ATG10    | 0.06206171  | 7.234260046 | 3.109512379 | 0.002075486 | 0.0442738   |
| OGG1     | 0.062670355 | 6.569975853 | 5.456653392 | 1.10E-07    | 6.37E-05    |
| MPP2     | 0.062840427 | 6.456945146 | 3.823152991 | 0.000163808 | 0.00997051  |
| SAMD10   | 0.062961205 | 6.654704614 | 3.719514562 | 0.000243002 | 0.01277386  |
| ZNF471   | 0.063280816 | 6.490013296 | 3.043867103 | 0.00256719  | 0.049795306 |
| NFIC     | 0.06337431  | 7.071026067 | 3.065249695 | 0.002396354 | 0.047829454 |
| LOC64391 | 0.063400635 | 6.614420457 | 3.184963027 | 0.001618365 | 0.037830134 |
| ASRGL1   | 0.063419882 | 6.411812861 | 3.497867136 | 0.000548671 | 0.020364765 |
| LY75     | 0.063523901 | 6.571267774 | 3.09756756  | 0.002157928 | 0.045115283 |
| DTNB     | 0.063803497 | 6.599894335 | 3.063221426 | 0.002412098 | 0.047921365 |
| C19orf57 | 0.064441655 | 6.436634368 | 6.82072962  | 5.98E-11    | 7.30E-08    |
| RNF207   | 0.064853898 | 6.639321117 | 3.332733746 | 0.000980774 | 0.028399438 |
| CAMK1    | 0.065451907 | 6.674485742 | 3.386256974 | 0.000814454 | 0.025545532 |
| ANKRD4   | 0.065478306 | 6.476805418 | 3.113861377 | 0.002046198 | 0.043936433 |
| E2F8     | 0.066046076 | 6.498110635 | 3.952806866 | 9.88E-05    | 0.007461574 |
| ZFP14    | 0.06606136  | 6.587788281 | 3.101384651 | 0.002131261 | 0.044813576 |
| LOC10013 | 0.066457706 | 6.623042281 | 3.248592855 | 0.001307297 | 0.033479303 |
| SGOL1    | 0.066596548 | 6.749712044 | 3.10833469  | 0.002083483 | 0.044317888 |
| LDHC     | 0.066615596 | 6.53917266  | 3.232087506 | 0.001382165 | 0.034433472 |
| TCERGIL  | 0.066981636 | 6.377388506 | 3.108990226 | 0.002079028 | 0.0442738   |
| FASLG    | 0.067164579 | 6.457687637 | 3.770785879 | 0.000200145 | 0.01139321  |
| ATP6AP1  | 0.067176718 | 6.653429116 | 3.269263383 | 0.001218844 | 0.032073834 |
| TXNDC16  | 0.067684212 | 6.556181011 | 4.253368473 | 2.91E-05    | 0.003419267 |
| LOC64448 | 0.068551718 | 6.688726834 | 3.662603803 | 0.000300656 | 0.014442048 |
| PARP16   | 0.069219578 | 6.79563621  | 3.352327184 | 0.000916525 | 0.027325368 |
| LOC64346 | 0.069647631 | 6.548734898 | 4.036443379 | 7.08E-05    | 0.00602272  |
| C20orf96 | 0.069860199 | 6.552990834 | 4.162223517 | 4.25E-05    | 0.004342387 |
| ZNF473   | 0.070271788 | 7.154917863 | 3.381919613 | 0.000826883 | 0.025771788 |
| CD1E     | 0.071420941 | 6.612618634 | 3.13233781  | 0.001925972 | 0.042108836 |
| PSMC3IP  | 0.072112515 | 6.812481375 | 3.134662547 | 0.001911316 | 0.041913513 |
| IL16     | 0.072470178 | 6.484880306 | 3.127209678 | 0.00195867  | 0.042527515 |
| GKAP1    | 0.072544577 | 6.553614965 | 3.888440824 | 0.000127212 | 0.008550166 |
| TMCO4    | 0.072678209 | 6.711199164 | 3.68056897  | 0.000281193 | 0.014135531 |
| WDR76    | 0.072851373 | 6.558957788 | 4.107239818 | 5.32E-05    | 0.004952608 |
| HPDL     | 0.072994503 | 6.517675209 | 3.129566064 | 0.001943582 | 0.042357967 |
| VRK3     | 0.073182258 | 7.065307714 | 3.400018427 | 0.000776162 | 0.025080311 |
| SLC1A1   | 0.074253798 | 6.478391136 | 3.669121298 | 0.000293453 | 0.014386681 |
| TOPORS   | 0.074283465 | 7.119210233 | 3.211804976 | 0.00147961  | 0.035845051 |
| MAMDC4   | 0.074569889 | 6.517523501 | 3.962578029 | 9.51E-05    | 0.007278882 |
| RCADH5   | 0.074890115 | 7.006081405 | 3.076143654 | 0.0023134   | 0.046979988 |
| LOC64556 | 0.074899269 | 6.523418904 | 3.867491975 | 0.000138014 | 0.008902581 |
| SLC16A8  | 0.074989072 | 6.382863094 | 4.322782658 | 2.17E-05    | 0.002858244 |
| LOC28378 | 0.075686957 | 6.987303851 | 3.930364069 | 0.000107955 | 0.007777378 |
| ZNF488   | 0.075690543 | 6.525511135 | 3.077023746 | 0.002306816 | 0.046889602 |
| UBASH3A  | 0.075874693 | 6.428839343 | 3.797520083 | 0.000180736 | 0.010762336 |
| LOC10013 | 0.076094107 | 6.456815344 | 5.540304195 | 7.20E-08    | 4.52E-05    |
| ZNF300   | 0.076216332 | 6.551251262 | 3.15535717  | 0.001785315 | 0.040152217 |
| TRIM74   | 0.076270753 | 6.47162541  | 5.252303343 | 3.06E-07    | 0.000149365 |
| SYNJ1    | 0.076493679 | 7.209272906 | 3.950475284 | 9.97E-05    | 0.007489916 |

|          |             |             |             |             |             |
|----------|-------------|-------------|-------------|-------------|-------------|
| VILL     | 0.076618492 | 6.511482057 | 3.758956098 | 0.000209347 | 0.011691789 |
| ZNF684   | 0.076638983 | 6.833222984 | 3.196269633 | 0.00155851  | 0.037006937 |
| FIZ1     | 0.076655239 | 7.36310636  | 3.195230345 | 0.001563925 | 0.037070261 |
| C14orf28 | 0.077465203 | 6.880389506 | 3.056119001 | 0.002467981 | 0.048746681 |
| ATXN7L2  | 0.077803453 | 6.908580624 | 3.333786086 | 0.000977219 | 0.028365183 |
| UBXN11   | 0.077841914 | 6.759354329 | 3.914021949 | 0.000115107 | 0.008054954 |
| PHF17    | 0.078829654 | 6.842241909 | 4.565735098 | 7.58E-06    | 0.001501482 |
| VWCE     | 0.078900682 | 6.518403744 | 3.139354978 | 0.001882046 | 0.04147863  |
| SLC25A2  | 0.079104618 | 6.861515825 | 3.123496782 | 0.001982662 | 0.042878978 |
| KIAA1328 | 0.07940948  | 6.621412555 | 4.842424337 | 2.17E-06    | 0.000643702 |
| C19orf36 | 0.080097406 | 6.521345549 | 3.346575311 | 0.000934967 | 0.027538916 |
| WDR7     | 0.080113748 | 7.099909882 | 3.621800351 | 0.000349675 | 0.015940668 |
| INPP5B   | 0.080153552 | 6.890556891 | 3.939049237 | 0.000104328 | 0.007621426 |
| LOC28636 | 0.080675531 | 6.638439872 | 3.329042389 | 0.000993339 | 0.028420089 |
| PHF1     | 0.080721098 | 7.001685423 | 3.7463122   | 0.000219625 | 0.012086891 |
| C7orf13  | 0.081294798 | 6.622249746 | 3.6281287   | 0.000341609 | 0.015835804 |
| IRF2     | 0.081471739 | 7.102704628 | 3.391381095 | 0.000799994 | 0.025412709 |
| PDCD1    | 0.081887915 | 6.506669211 | 3.08221245  | 0.002268344 | 0.046451365 |
| KIAA1641 | 0.082314849 | 6.885357336 | 3.426232863 | 0.000707827 | 0.023817889 |
| LOC40101 | 0.082799763 | 12.68253217 | 3.585503356 | 0.000399506 | 0.016998119 |
| RFC1     | 0.083284351 | 7.658358263 | 3.458922268 | 0.000630484 | 0.02220925  |
| PARD6A   | 0.083296799 | 6.526618344 | 4.645695628 | 5.31E-06    | 0.001203451 |
| SAMD1    | 0.083490029 | 6.863031594 | 3.546987589 | 0.000459636 | 0.018362882 |
| LOC10012 | 0.083523937 | 6.582711091 | 4.30974572  | 2.30E-05    | 0.002984673 |
| ATPAF1   | 0.08355672  | 7.841794046 | 3.334954326 | 0.000973287 | 0.028325884 |
| MAT2B    | 0.08384672  | 7.894996432 | 3.064673549 | 0.002400817 | 0.047829454 |
| FAM159A  | 0.08387541  | 6.408785057 | 4.060946467 | 6.42E-05    | 0.005573257 |
| HLCS     | 0.084411396 | 6.74879316  | 4.223217906 | 3.30E-05    | 0.00371425  |
| PWWP2A   | 0.085197755 | 7.253444422 | 3.394853979 | 0.000790331 | 0.02527794  |
| MYO5B    | 0.085356414 | 6.801381584 | 3.132407466 | 0.001925531 | 0.042108836 |
| CHADL    | 0.085460539 | 6.607380217 | 4.465940951 | 1.17E-05    | 0.001985932 |
| MORC4    | 0.085619514 | 6.952203793 | 3.241752082 | 0.001337858 | 0.033976898 |
| SIRPG    | 0.085774273 | 6.478235857 | 3.672914995 | 0.000289335 | 0.014283147 |
| ZNF540   | 0.085965734 | 6.449165755 | 4.227913177 | 3.24E-05    | 0.003684429 |
| WHSC2    | 0.08642459  | 6.998615851 | 4.120991472 | 5.03E-05    | 0.004804771 |
| ALDH16A  | 0.086495326 | 7.351310104 | 3.310256166 | 0.001059636 | 0.029698203 |
| CNOT10   | 0.086862472 | 7.339312149 | 4.020748861 | 7.54E-05    | 0.006301382 |
| ANKRD34  | 0.086923516 | 6.34396531  | 4.675443036 | 4.65E-06    | 0.00113168  |
| HMX2     | 0.087367683 | 6.48703152  | 4.330339802 | 2.10E-05    | 0.002808838 |
| TRIM45   | 0.08749749  | 6.714906837 | 3.928513151 | 0.000108744 | 0.007808572 |
| RAB28    | 0.088109012 | 7.004257986 | 3.698270134 | 0.000263182 | 0.013448603 |
| GOLT1A   | 0.08811893  | 6.487490659 | 3.996645642 | 8.30E-05    | 0.006683973 |
| ELF2     | 0.088593574 | 7.339518147 | 4.088215432 | 5.75E-05    | 0.005175237 |
| SNRNP25  | 0.088608731 | 6.953543859 | 3.570936627 | 0.000421322 | 0.017507242 |
| DCLRE1E  | 0.089041774 | 6.628667807 | 4.882302514 | 1.80E-06    | 0.000557487 |
| PRRT3    | 0.089509152 | 6.724686868 | 3.387592056 | 0.000810663 | 0.0254881   |
| LOC65212 | 0.089555242 | 6.46271971  | 3.538704405 | 0.000473632 | 0.018650745 |
| GPT      | 0.089748942 | 6.497529452 | 3.250167625 | 0.001300354 | 0.033379305 |
| RNPC3    | 0.090082197 | 7.339597988 | 3.597421762 | 0.000382451 | 0.016510025 |
| C21orf58 | 0.090474801 | 7.439200497 | 3.54100946  | 0.000469698 | 0.018574851 |
| YPEL1    | 0.090477909 | 6.557507178 | 4.296872143 | 2.42E-05    | 0.003048284 |

|          |             |             |             |             |             |
|----------|-------------|-------------|-------------|-------------|-------------|
| SP5      | 0.090890472 | 6.425097332 | 3.52377132  | 0.000499879 | 0.019210951 |
| RBBP4    | 0.090902224 | 7.566624983 | 3.969795901 | 9.24E-05    | 0.007127413 |
| LOC64428 | 0.091068378 | 6.600157206 | 4.383402158 | 1.68E-05    | 0.002474228 |
| APOC2    | 0.091127914 | 6.556408551 | 3.774775331 | 0.000197128 | 0.011257239 |
| LOC65237 | 0.091196462 | 6.4286615   | 5.676109334 | 3.57E-08    | 2.66E-05    |
| SIGIRR   | 0.091276605 | 6.776882695 | 5.181728441 | 4.32E-07    | 0.000193192 |
| FBXW5    | 0.091496712 | 7.102658749 | 3.726982987 | 0.000236261 | 0.012569873 |
| BUB3     | 0.091563027 | 8.631053574 | 3.176427378 | 0.001664952 | 0.038468965 |
| MUTED    | 0.09220201  | 7.858131277 | 3.094568614 | 0.002179096 | 0.045177126 |
| MRPS36   | 0.092600603 | 6.850918588 | 3.69409452  | 0.00026733  | 0.013597319 |
| PMF1     | 0.092603296 | 7.164232629 | 3.88188038  | 0.000130506 | 0.008689698 |
| BAX      | 0.0928245   | 7.25291656  | 3.598545358 | 0.000380879 | 0.016474527 |
| LOC92497 | 0.09294031  | 6.652821155 | 4.730996789 | 3.61E-06    | 0.000945495 |
| VHL      | 0.09304332  | 7.370013587 | 3.851960981 | 0.000146577 | 0.00917989  |
| DBP      | 0.093287053 | 6.799119475 | 3.861030903 | 0.000141517 | 0.008975489 |
| FANCD2   | 0.093420495 | 6.970377558 | 4.394321    | 1.60E-05    | 0.002393156 |
| LOC65128 | 0.09358808  | 6.544789355 | 3.839493316 | 0.000153812 | 0.009574269 |
| PYHIN1   | 0.094342422 | 6.647542403 | 3.232735268 | 0.001379154 | 0.034397442 |
| CABLES2  | 0.094402115 | 6.943838325 | 3.151984389 | 0.001805312 | 0.040310997 |
| TAPT1    | 0.094483051 | 7.366971899 | 3.153947509 | 0.001793647 | 0.040204938 |
| FAM111B  | 0.094501251 | 6.581973245 | 4.50729095  | 9.81E-06    | 0.001766816 |
| TADA3    | 0.094519582 | 7.599632337 | 4.054500393 | 6.59E-05    | 0.005652985 |
| USP37    | 0.094569874 | 7.540499489 | 3.413300589 | 0.000740804 | 0.024378479 |
| MGA      | 0.094801108 | 6.957948933 | 5.646431362 | 4.16E-08    | 2.87E-05    |
| TSPAN32  | 0.095606471 | 6.618469098 | 3.474787117 | 0.000595867 | 0.021358866 |
| KIAA1712 | 0.096004918 | 7.462445648 | 3.576018975 | 0.000413586 | 0.017408967 |
| SLC4A2   | 0.096548476 | 7.322404213 | 3.064512126 | 0.002402068 | 0.047829454 |
| STMN1    | 0.096673081 | 7.143634207 | 3.86547244  | 0.0001391   | 0.008902581 |
| GPX1     | 0.097267907 | 8.253720339 | 3.365768565 | 0.000874741 | 0.02658948  |
| MED12    | 0.097356826 | 7.620550787 | 3.350380203 | 0.000922729 | 0.027473069 |
| NOXO1    | 0.097638918 | 6.691214298 | 3.20735001  | 0.001501848 | 0.036224055 |
| APOBEC3  | 0.097666558 | 6.541419863 | 3.534354785 | 0.000481141 | 0.018822333 |
| RNF5     | 0.098102095 | 7.170250638 | 4.115682255 | 5.14E-05    | 0.004853234 |
| C21orf45 | 0.098803804 | 7.271534342 | 3.422712229 | 0.000716666 | 0.023932065 |
| PCBD2    | 0.100014381 | 6.870537814 | 3.788111853 | 0.000187354 | 0.010919681 |
| GPAT2    | 0.100036777 | 6.416522288 | 5.947767782 | 8.44E-09    | 8.06E-06    |
| BCOR     | 0.100214258 | 7.263519971 | 3.672378568 | 0.000289914 | 0.014283147 |
| HNRPH3   | 0.100680982 | 7.706336966 | 3.407207966 | 0.000756832 | 0.024710055 |
| UBE2D2   | 0.100750299 | 7.359506266 | 3.802725916 | 0.000177169 | 0.010665587 |
| GIN1     | 0.100830009 | 6.796804826 | 3.982591167 | 8.78E-05    | 0.006941247 |
| ALKBH7   | 0.101507768 | 7.22981037  | 3.400888177 | 0.000773799 | 0.025040788 |
| ZNF33B   | 0.101722766 | 7.504673787 | 3.067917272 | 0.002375792 | 0.047805203 |
| CLGN     | 0.102002022 | 6.395315117 | 4.374238007 | 1.74E-05    | 0.002539147 |
| C5orf34  | 0.102285911 | 6.710452551 | 4.346419287 | 1.96E-05    | 0.002749869 |
| MLH1     | 0.102327362 | 7.982659529 | 3.60187191  | 0.00037626  | 0.016416306 |
| UBR7     | 0.102814677 | 8.095681264 | 3.498566297 | 0.000547297 | 0.020348157 |
| LOC65318 | 0.103077872 | 6.429081161 | 5.595415707 | 5.42E-08    | 3.54E-05    |
| RASSF1   | 0.103134676 | 7.072638523 | 4.334178458 | 2.07E-05    | 0.002790174 |
| DMXL1    | 0.103353332 | 6.887584934 | 3.87032528  | 0.000136504 | 0.008902581 |
| FAM98C   | 0.103395559 | 7.113779936 | 3.932611977 | 0.000107005 | 0.007734283 |
| CNNM3    | 0.10352206  | 7.426927199 | 3.173892608 | 0.001679024 | 0.038631606 |

|           |             |             |             |             |             |
|-----------|-------------|-------------|-------------|-------------|-------------|
| FLJ13305  | 0.103622414 | 6.769655245 | 3.279607189 | 0.001176698 | 0.031567639 |
| B9D2      | 0.103840747 | 7.511188554 | 3.095158132 | 0.00217492  | 0.045177126 |
| ZNF232    | 0.104276605 | 7.180926641 | 3.389976904 | 0.000803933 | 0.025419163 |
| ABHD14E   | 0.104569513 | 7.044480564 | 3.088063017 | 0.002225674 | 0.045833861 |
| ZNF248    | 0.104899255 | 7.163770936 | 3.374992376 | 0.000847102 | 0.026069161 |
| GUSBL1    | 0.105037479 | 7.630214862 | 3.090236435 | 0.002210012 | 0.045596796 |
| PHF19     | 0.105149316 | 7.284206108 | 3.872104081 | 0.000135564 | 0.008891765 |
| UBE3A     | 0.106121808 | 8.991709344 | 3.258119723 | 0.001265814 | 0.032799224 |
| RTKN2     | 0.106492912 | 6.566220908 | 4.804258155 | 2.59E-06    | 0.000723965 |
| C18orf32  | 0.10667965  | 7.707658244 | 3.46334736  | 0.000620644 | 0.022088935 |
| EPM2AIP   | 0.106839518 | 7.762098829 | 3.061672664 | 0.002424184 | 0.048117968 |
| CETN3     | 0.106919491 | 7.365555654 | 3.331475412 | 0.00098504  | 0.028420089 |
| PPM1D     | 0.107098275 | 7.545342598 | 3.120426897 | 0.002002705 | 0.043142579 |
| C9orf116  | 0.107105158 | 6.671452289 | 3.329052449 | 0.000993304 | 0.028420089 |
| LOC64680  | 0.107120588 | 6.964677633 | 3.585064747 | 0.000400148 | 0.016998119 |
| C19orf62  | 0.107146636 | 8.048834829 | 3.573877739 | 0.000416829 | 0.017412518 |
| RBBP9     | 0.107264132 | 7.292416699 | 4.233583637 | 3.16E-05    | 0.003636067 |
| AKR7A3    | 0.107389218 | 8.286842512 | 3.183835735 | 0.001624447 | 0.037872573 |
| SMPDL3E   | 0.10751668  | 6.538522302 | 4.341973201 | 2.00E-05    | 0.002749869 |
| MTMR14    | 0.107563492 | 7.592255739 | 4.115759222 | 5.14E-05    | 0.004853234 |
| ZBTB5     | 0.107891973 | 7.66078344  | 3.129331705 | 0.001945078 | 0.042357967 |
| CRYGS     | 0.107984656 | 6.990087029 | 3.483820316 | 0.00057696  | 0.020811935 |
| RNF5P1    | 0.108427426 | 7.553094252 | 3.923126584 | 0.000111069 | 0.00787265  |
| WDR51B    | 0.10848412  | 7.569200117 | 3.500414629 | 0.000543682 | 0.020316862 |
| C14orf73  | 0.109029076 | 6.615557114 | 3.174465071 | 0.001675836 | 0.038631606 |
| TBCD      | 0.109124525 | 7.425070861 | 3.154521917 | 0.001790248 | 0.040197041 |
| DUT       | 0.109272679 | 7.395512712 | 3.626764666 | 0.000343332 | 0.015848832 |
| ZWINT     | 0.109559066 | 7.26158078  | 3.621168275 | 0.00035049  | 0.015941807 |
| PYGO2     | 0.109696574 | 7.063124178 | 4.324216916 | 2.16E-05    | 0.002858034 |
| APITD1    | 0.110136132 | 7.335827244 | 3.498932617 | 0.000546579 | 0.020348157 |
| FAM178A   | 0.110189226 | 7.784602773 | 3.064459677 | 0.002402475 | 0.047829454 |
| HMGN2     | 0.110756789 | 8.178152047 | 3.977701764 | 8.95E-05    | 0.007001783 |
| BRD8      | 0.110948383 | 8.071861375 | 3.360157561 | 0.000891962 | 0.026958857 |
| AMY2B     | 0.110960631 | 6.771560815 | 3.417681833 | 0.000729474 | 0.024160782 |
| FAF1      | 0.111092549 | 8.019782428 | 3.642469453 | 0.000323974 | 0.015308982 |
| C19orf25  | 0.111182553 | 7.120165232 | 3.823921865 | 0.000163324 | 0.00997051  |
| APPL1     | 0.111186571 | 7.704867112 | 3.288661064 | 0.001140923 | 0.030835807 |
| AGL       | 0.111192534 | 7.737036672 | 3.721052437 | 0.000241599 | 0.012761182 |
| ZNF564    | 0.111265833 | 7.271085828 | 3.678421153 | 0.000283456 | 0.014187639 |
| LOC65420  | 0.111278534 | 7.06587579  | 3.789702016 | 0.000186219 | 0.010882429 |
| XRCC1     | 0.11146259  | 7.279059264 | 3.627007    | 0.000343026 | 0.015848832 |
| C6orf190  | 0.111810226 | 6.601306669 | 3.168307883 | 0.001710416 | 0.038960921 |
| FAM53B    | 0.112081023 | 7.421673564 | 4.499558049 | 1.01E-05    | 0.001798149 |
| C19orf43  | 0.112086866 | 9.425970069 | 3.495133341 | 0.000554072 | 0.020393018 |
| NUP62     | 0.112258451 | 8.802246455 | 3.142227621 | 0.001864332 | 0.041253746 |
| LOC100131 | 0.112683197 | 7.645692273 | 5.110648003 | 6.10E-07    | 0.000235199 |
| HMHA1     | 0.11269011  | 6.989584326 | 3.1231454   | 0.001984947 | 0.042886177 |
| CREB3L4   | 0.113250291 | 6.660257496 | 4.385669851 | 1.66E-05    | 0.002466856 |
| SUOX      | 0.113299858 | 7.740018918 | 3.044859303 | 0.002559021 | 0.049722918 |
| TRAF2     | 0.113350215 | 6.908558509 | 3.317405073 | 0.001033937 | 0.029185086 |
| RMND5B    | 0.113378579 | 7.281829041 | 3.730557366 | 0.000233097 | 0.012492315 |

|          |             |             |             |             |             |
|----------|-------------|-------------|-------------|-------------|-------------|
| DMRTA2   | 0.113403789 | 6.549483346 | 3.744163666 | 0.000221418 | 0.012132691 |
| CENPM    | 0.11475773  | 7.06179582  | 3.798881881 | 0.000179796 | 0.01073549  |
| GPR18    | 0.114798458 | 6.497288041 | 3.370982591 | 0.000859016 | 0.026288513 |
| SLC6A16  | 0.115113616 | 6.728929568 | 3.423945137 | 0.000713559 | 0.023900958 |
| SP1      | 0.115465976 | 8.378717376 | 4.01489341  | 7.72E-05    | 0.0063791   |
| ANKRD30  | 0.115746063 | 7.116795207 | 3.688289919 | 0.000273199 | 0.013863725 |
| TATDN2   | 0.115941605 | 7.875086489 | 3.617218156 | 0.000355626 | 0.016111709 |
| EXOSC9   | 0.116644263 | 8.37749801  | 3.356071882 | 0.000904701 | 0.02720647  |
| KLF11    | 0.116839278 | 7.393912156 | 3.69461842  | 0.000266806 | 0.013597319 |
| HNRNPAL1 | 0.116950271 | 9.490829017 | 3.09141971  | 0.002201528 | 0.045507212 |
| ASTE1    | 0.11708445  | 7.369622103 | 3.212719126 | 0.001475084 | 0.035845051 |
| GLS2     | 0.117219412 | 6.513053511 | 5.72336428  | 2.78E-08    | 2.27E-05    |
| LGALS9   | 0.117778607 | 6.706667026 | 4.025429142 | 7.40E-05    | 0.006207969 |
| GPBP1    | 0.117879174 | 8.673893126 | 3.23774128  | 0.001356083 | 0.033976898 |
| LOC44092 | 0.117898942 | 9.98169886  | 3.446204418 | 0.000659584 | 0.022716365 |
| SLC27A5  | 0.11802934  | 6.784346472 | 3.301131361 | 0.001093303 | 0.030141967 |
| PIN1     | 0.118059385 | 9.524595077 | 3.458576176 | 0.00063126  | 0.02220925  |
| TCF19    | 0.118063891 | 6.720907763 | 5.216940468 | 3.64E-07    | 0.000166592 |
| SLC25A38 | 0.11885865  | 6.96692361  | 3.343085656 | 0.000946324 | 0.027822328 |
| CXCR3    | 0.119114764 | 6.716972405 | 3.335347751 | 0.000971966 | 0.028324959 |
| FLJ25996 | 0.119641461 | 6.591527286 | 3.413175767 | 0.000741129 | 0.024378479 |
| SSX2IP   | 0.120059969 | 6.762568581 | 4.455741661 | 1.23E-05    | 0.002029068 |
| NFYC     | 0.120065461 | 8.329957042 | 3.662441188 | 0.000300838 | 0.014442048 |
| FAM116A  | 0.120819906 | 8.483076859 | 3.601211135 | 0.000377174 | 0.016416306 |
| MDK      | 0.120943568 | 7.021551469 | 4.223872454 | 3.29E-05    | 0.00371425  |
| LRRC56   | 0.121001675 | 6.902906172 | 3.139788981 | 0.00187936  | 0.04147863  |
| SYNGR3   | 0.121127717 | 6.392984293 | 8.01019199  | 3.50E-14    | 7.68E-11    |
| TEX9     | 0.121233972 | 6.922797689 | 3.205473617 | 0.001511308 | 0.036358362 |
| RAPGEF6  | 0.121354888 | 7.848793538 | 3.280336874 | 0.001173777 | 0.031529819 |
| ENPP6    | 0.121677431 | 6.45424412  | 3.413213432 | 0.000741031 | 0.024378479 |
| LOC72968 | 0.121722781 | 7.18957242  | 3.957541888 | 9.70E-05    | 0.007348516 |
| LRDD     | 0.12219933  | 7.004217775 | 3.767936676 | 0.000202326 | 0.011428533 |
| RSBN1    | 0.122891463 | 8.150131619 | 3.101919386 | 0.002127549 | 0.044813576 |
| ZNF700   | 0.123206502 | 8.012681371 | 3.228456247 | 0.001399162 | 0.034748138 |
| LOC64493 | 0.123857924 | 8.053574992 | 4.094269313 | 5.61E-05    | 0.005070412 |
| WRB      | 0.124082692 | 7.746465602 | 3.185924968 | 0.001613191 | 0.037749351 |
| ZNF524   | 0.124761562 | 7.418266445 | 3.866231891 | 0.000138691 | 0.008902581 |
| CRBN     | 0.124860956 | 7.725595425 | 3.273185305 | 0.001202701 | 0.03183971  |
| METTL4   | 0.125339844 | 7.133948998 | 3.940578071 | 0.000103701 | 0.007621426 |
| C9orf82  | 0.126604073 | 7.21616504  | 4.280106834 | 2.60E-05    | 0.003175328 |
| PTAR1    | 0.126900224 | 7.855662912 | 3.432554866 | 0.00069221  | 0.023473555 |
| ZNF644   | 0.126958365 | 7.788555801 | 4.329735254 | 2.11E-05    | 0.002808838 |
| GUSB     | 0.127175496 | 8.500782318 | 3.094866973 | 0.002176981 | 0.045177126 |
| GRIN2C   | 0.127672259 | 6.47635614  | 7.375157419 | 2.04E-12    | 2.99E-09    |
| CST7     | 0.127916115 | 7.056222999 | 3.065833836 | 0.002391838 | 0.047829454 |
| POLA1    | 0.128135434 | 7.864648301 | 3.224623038 | 0.001417314 | 0.034913263 |
| MRPS27   | 0.128210919 | 8.691821135 | 3.566459841 | 0.000428248 | 0.017643328 |
| ZNF260   | 0.12893975  | 7.314708444 | 3.682593128 | 0.000279076 | 0.014064539 |
| HNRPUL1  | 0.130231765 | 9.784066856 | 3.304410551 | 0.001081091 | 0.030036156 |
| NR1D2    | 0.130372879 | 7.273317648 | 3.483892014 | 0.000576812 | 0.020811935 |
| RAB33B   | 0.130935122 | 7.729405596 | 3.987902894 | 8.60E-05    | 0.006838213 |

|          |             |             |             |             |             |
|----------|-------------|-------------|-------------|-------------|-------------|
| NXT2     | 0.131018599 | 8.110862799 | 3.103860298 | 0.002114127 | 0.044710029 |
| ANKRD36  | 0.1311058   | 6.869346033 | 3.769012499 | 0.000201499 | 0.011411205 |
| AMY2A    | 0.131611354 | 6.796752868 | 4.133010105 | 4.79E-05    | 0.004622417 |
| CHCHD4   | 0.131639206 | 8.42553807  | 3.611417395 | 0.000363298 | 0.016192165 |
| DONSON   | 0.131656433 | 7.296987747 | 3.523069228 | 0.000501146 | 0.019210951 |
| FAM81A   | 0.131834866 | 6.475012219 | 4.246910281 | 2.99E-05    | 0.003494191 |
| CLK4     | 0.132009278 | 7.365712386 | 3.259799556 | 0.001258628 | 0.032651514 |
| FRG1     | 0.132291013 | 9.465405809 | 3.047336379 | 0.002538732 | 0.049444144 |
| SMARCC   | 0.132949508 | 9.530588859 | 3.269351167 | 0.00121848  | 0.032073834 |
| LCOR     | 0.1330065   | 8.815534499 | 3.239469625 | 0.001348202 | 0.033976898 |
| LOC20172 | 0.133265657 | 7.297109853 | 3.720147421 | 0.000242423 | 0.01277386  |
| ZFYVE20  | 0.133462662 | 8.586410188 | 4.27565137  | 2.65E-05    | 0.003199806 |
| PPA2     | 0.133561488 | 10.17944332 | 4.219255533 | 3.35E-05    | 0.003729274 |
| CCNE2    | 0.13360552  | 7.107253092 | 3.629420881 | 0.000339984 | 0.015793781 |
| ATG7     | 0.133612886 | 8.275894503 | 3.211982151 | 0.001478731 | 0.035845051 |
| LOC44148 | 0.133690517 | 7.436585334 | 3.712585651 | 0.000249417 | 0.012996865 |
| BRPF1    | 0.134000577 | 8.286349156 | 5.241164119 | 3.23E-07    | 0.00015435  |
| SS18L2   | 0.134784471 | 10.51352898 | 3.496276039 | 0.000551808 | 0.020393018 |
| HIRIP3   | 0.135209457 | 7.821667341 | 3.778040553 | 0.000194692 | 0.01119884  |
| ANKRA2   | 0.135420557 | 8.019092762 | 3.348697067 | 0.000928124 | 0.02748785  |
| PRMT2    | 0.135690839 | 7.650220594 | 3.933728205 | 0.000106536 | 0.007725808 |
| C19orf46 | 0.135982225 | 6.684511412 | 3.202918759 | 0.001524276 | 0.036411388 |
| LOC10013 | 0.136017319 | 9.120750989 | 3.366777936 | 0.000871676 | 0.026564952 |
| SYCE2    | 0.136571981 | 6.451129564 | 7.916248948 | 6.46E-14    | 1.18E-10    |
| PCNA     | 0.136600087 | 8.297488249 | 3.740936337 | 0.000224137 | 0.012181382 |
| HNRNPHK  | 0.136885696 | 8.398834496 | 3.058791218 | 0.002446818 | 0.048479641 |
| PTN      | 0.137191917 | 6.784459552 | 3.229103782 | 0.001396117 | 0.034741649 |
| NAP1L4   | 0.137222101 | 9.990563219 | 3.13955798  | 0.001880789 | 0.04147863  |
| ZBTB8A   | 0.137958369 | 7.57844102  | 3.554998813 | 0.00044647  | 0.018100148 |
| RNF32    | 0.13814446  | 6.610787765 | 5.810598322 | 1.76E-08    | 1.61E-05    |
| LOC73095 | 0.138218705 | 7.090705841 | 3.414528978 | 0.000737611 | 0.024372211 |
| SUMO3    | 0.138615657 | 10.82257328 | 3.109156775 | 0.002077898 | 0.0442738   |
| ACTR1B   | 0.139328527 | 8.030096322 | 4.448906029 | 1.27E-05    | 0.002059161 |
| XK       | 0.139541417 | 6.652140057 | 3.525655742 | 0.000496493 | 0.019210951 |
| TMEM80   | 0.139936944 | 7.348268392 | 4.574011809 | 7.31E-06    | 0.00147403  |
| FLT3LG   | 0.140255851 | 6.957848565 | 3.589139192 | 0.000394229 | 0.016885772 |
| LOC73179 | 0.140459182 | 6.570428861 | 4.319256321 | 2.21E-05    | 0.002883999 |
| MGC1576  | 0.140593585 | 6.943869699 | 5.150129431 | 5.04E-07    | 0.000207078 |
| ISOC2    | 0.140702785 | 8.048000068 | 3.135755649 | 0.00190446  | 0.041818053 |
| UQCRC1   | 0.140973352 | 9.213966199 | 3.580064591 | 0.000407524 | 0.017220261 |
| TUSC4    | 0.141004981 | 8.400192691 | 3.293568312 | 0.001121959 | 0.030559002 |
| LOC72950 | 0.141165898 | 7.505075686 | 4.075010539 | 6.06E-05    | 0.005371554 |
| LOC54147 | 0.141691649 | 6.532838268 | 6.392854484 | 7.17E-10    | 7.50E-07    |
| C5orf5   | 0.141759536 | 7.823809634 | 3.630929719 | 0.000338095 | 0.015739323 |
| APOBEC3  | 0.142182877 | 7.349017913 | 4.180153307 | 3.94E-05    | 0.004195649 |
| MNS1     | 0.142384711 | 7.097214324 | 3.152887349 | 0.001799938 | 0.040234018 |
| C3orf70  | 0.142716313 | 6.856954853 | 3.124936538 | 0.001973327 | 0.042719119 |
| C9orf40  | 0.143169567 | 7.060583563 | 3.96117205  | 9.56E-05    | 0.007294074 |
| LOC39287 | 0.143272654 | 6.768672326 | 3.382931232 | 0.000823969 | 0.025717423 |
| NKX2-3   | 0.143319061 | 6.463163174 | 5.474073958 | 1.01E-07    | 5.99E-05    |
| RPAIN    | 0.143660512 | 9.056287486 | 3.274283327 | 0.001198218 | 0.031802072 |



|          |             |             |             |             |             |
|----------|-------------|-------------|-------------|-------------|-------------|
| KIF15    | 0.143882911 | 7.393690753 | 3.560665959 | 0.000437371 | 0.017863091 |
| UPF3B    | 0.144238077 | 8.12359988  | 3.520422194 | 0.00050595  | 0.019233981 |
| ABCA2    | 0.145051167 | 6.702141545 | 4.674272516 | 4.67E-06    | 0.00113168  |
| P4HTM    | 0.145369194 | 7.268227558 | 3.425014603 | 0.000710874 | 0.023847378 |
| IL2RG    | 0.14573871  | 6.743925484 | 3.639869822 | 0.000327106 | 0.015423805 |
| GIN53    | 0.145792384 | 8.016153771 | 3.237066174 | 0.001359174 | 0.034014945 |
| HACL1    | 0.146132273 | 8.271685734 | 3.271505562 | 0.001209591 | 0.031906764 |
| ACBD7    | 0.146487562 | 6.548741782 | 3.87803327  | 0.000132474 | 0.008741317 |
| ZNF641   | 0.147116799 | 7.301966151 | 4.362150772 | 1.84E-05    | 0.002652281 |
| NDUFA2   | 0.147241632 | 9.58739662  | 3.353141881 | 0.00091394  | 0.027325368 |
| NR2C2AP  | 0.147485665 | 7.842073236 | 3.587335576 | 0.000396839 | 0.016964478 |
| RAB26    | 0.147618351 | 6.778550769 | 3.699728203 | 0.000261748 | 0.013447362 |
| CUL9     | 0.147761981 | 7.567945009 | 3.35894381  | 0.000895729 | 0.026998428 |
| LOC34737 | 0.148023029 | 9.220396095 | 3.324601415 | 0.001008653 | 0.028783289 |
| GPC2     | 0.148300129 | 6.985949447 | 4.109698655 | 5.27E-05    | 0.004924133 |
| C3orf19  | 0.148384361 | 8.125883399 | 4.254256927 | 2.90E-05    | 0.003419267 |
| APOBEC3  | 0.148477642 | 7.133623348 | 3.043541493 | 0.002569876 | 0.049795306 |
| RPS6KA5  | 0.14854733  | 7.543044298 | 3.321490155 | 0.001019513 | 0.028942831 |
| ATP5O    | 0.148784576 | 10.63475268 | 3.099955253 | 0.002141211 | 0.044907949 |
| LIN9     | 0.149308467 | 7.299899006 | 3.866002286 | 0.000138814 | 0.008902581 |
| C18orf22 | 0.149389236 | 7.120878295 | 5.057441296 | 7.88E-07    | 0.000279214 |
| USP1     | 0.149899954 | 7.647937647 | 5.223744488 | 3.52E-07    | 0.000164556 |
| JAK2     | 0.150106333 | 7.220454276 | 3.088447569 | 0.002222895 | 0.045819584 |
| SRGAP3   | 0.150326388 | 7.081026849 | 3.49721557  | 0.000549954 | 0.020377961 |
| GOT1     | 0.150856989 | 9.4309146   | 3.14496218  | 0.001847613 | 0.040966299 |
| DCI      | 0.150868451 | 7.988517305 | 3.592905751 | 0.000388832 | 0.016719757 |
| C18orf54 | 0.151025565 | 6.982727757 | 4.862461794 | 1.98E-06    | 0.000602889 |
| LOC64882 | 0.151083406 | 7.418557459 | 4.13665127  | 4.72E-05    | 0.004606981 |
| TSEN34   | 0.152240309 | 9.427412493 | 4.172775914 | 4.07E-05    | 0.004215145 |
| GPR137C  | 0.152490639 | 6.546043419 | 6.545542864 | 2.99E-10    | 3.46E-07    |
| SFRS10   | 0.152588857 | 9.865613709 | 3.980336338 | 8.86E-05    | 0.006953671 |
| CHDH     | 0.152639229 | 6.689307113 | 4.15414999  | 4.39E-05    | 0.004445734 |
| CTSW     | 0.15313462  | 6.815415077 | 3.924925766 | 0.000110287 | 0.007867986 |
| SREBF1   | 0.153422435 | 7.781639994 | 3.132890413 | 0.001922479 | 0.042108836 |
| DNAJC8   | 0.153654523 | 10.31843088 | 3.193471531 | 0.001573129 | 0.037168131 |
| CD4      | 0.155451687 | 6.75950614  | 3.718553976 | 0.000243882 | 0.012789525 |
| SETMAR   | 0.155854022 | 7.792463897 | 3.498930411 | 0.000546583 | 0.020348157 |
| E2F7     | 0.155876008 | 7.403099621 | 3.065104547 | 0.002397478 | 0.047829454 |
| C3orf10  | 0.155965887 | 8.582180725 | 3.129910373 | 0.001941386 | 0.042357967 |
| PDIK1L   | 0.156086386 | 7.427429884 | 3.860621191 | 0.000141742 | 0.008975489 |
| C19orf48 | 0.156164673 | 8.154081029 | 3.551085311 | 0.000452857 | 0.018156921 |
| EBP      | 0.15623231  | 8.061317272 | 3.206368027 | 0.001506792 | 0.036303439 |
| MYH14    | 0.156606501 | 6.990171385 | 3.30436413  | 0.001081263 | 0.030036156 |
| C3orf14  | 0.156983788 | 7.228376886 | 3.052318984 | 0.002498368 | 0.049102534 |
| RFX7     | 0.157488689 | 8.861077336 | 3.267268439 | 0.001227132 | 0.032176328 |
| MYO3A    | 0.157667631 | 6.522567279 | 4.673589009 | 4.69E-06    | 0.00113168  |
| C8G      | 0.158064452 | 6.565897936 | 4.214351674 | 3.42E-05    | 0.003768943 |
| LOC10012 | 0.159776534 | 6.623634757 | 4.575939109 | 7.25E-06    | 0.00147403  |
| HMGNI    | 0.160542014 | 10.62643068 | 3.451288773 | 0.000647803 | 0.022416025 |
| ACADM    | 0.161279727 | 8.840643974 | 3.125860095 | 0.001967359 | 0.042650824 |
| SMARCA   | 0.162054689 | 8.153273609 | 3.887584938 | 0.000127637 | 0.008550166 |

|          |             |             |             |             |             |
|----------|-------------|-------------|-------------|-------------|-------------|
| SH2D4A   | 0.162155029 | 7.178564266 | 3.613170637 | 0.000360963 | 0.016186601 |
| HDHD2    | 0.162580779 | 8.269548096 | 3.757630916 | 0.000210403 | 0.011704257 |
| CXCR6    | 0.163221173 | 6.691481151 | 3.888958997 | 0.000126955 | 0.008550166 |
| ITGB3BP  | 0.163409818 | 7.43343375  | 4.104065922 | 5.39E-05    | 0.004995827 |
| RBM17    | 0.163520701 | 8.519382844 | 3.285627167 | 0.001152797 | 0.031080257 |
| DDB2     | 0.163747947 | 7.180240832 | 5.178262291 | 4.40E-07    | 0.000193192 |
| PCDHB9   | 0.165010674 | 8.27740881  | 3.194298365 | 0.001568796 | 0.037145641 |
| CAPG     | 0.165748684 | 8.110582687 | 3.347954626 | 0.000930513 | 0.02748785  |
| LOC44032 | 0.16576368  | 6.683571187 | 3.296381798 | 0.001111218 | 0.030469592 |
| SUV39H1  | 0.166168283 | 8.141078542 | 3.45747181  | 0.000633741 | 0.02220925  |
| SFRS7    | 0.166559621 | 8.502505358 | 3.233716832 | 0.001374602 | 0.03434593  |
| PCNT     | 0.166566663 | 8.674630268 | 3.533704577 | 0.000482272 | 0.018822333 |
| ANKRD32  | 0.166614513 | 7.122306486 | 4.165205571 | 4.20E-05    | 0.004328244 |
| DCP2     | 0.167072465 | 8.594809704 | 3.456069958 | 0.000636904 | 0.022284551 |
| BCAT2    | 0.167923499 | 8.115274088 | 3.903331897 | 0.000120027 | 0.008319704 |
| RFC5     | 0.167983504 | 8.54100126  | 3.216618664 | 0.001455923 | 0.035545559 |
| TDRD10   | 0.168078744 | 6.527040714 | 5.672695546 | 3.63E-08    | 2.66E-05    |
| KEL      | 0.168596909 | 6.577505467 | 3.121432181 | 0.001996121 | 0.043085234 |
| LOC28402 | 0.168801596 | 7.697428862 | 3.204465854 | 0.001516411 | 0.036358362 |
| STIL     | 0.168855485 | 8.417011735 | 3.156995751 | 0.001775673 | 0.040017302 |
| POLR2I   | 0.169086863 | 8.917714451 | 4.012044524 | 7.81E-05    | 0.0063791   |
| FAM164A  | 0.169110811 | 7.473341484 | 3.574429168 | 0.000415992 | 0.01741064  |
| XPC      | 0.16925671  | 8.278236653 | 3.614014289 | 0.000359844 | 0.016183947 |
| CD3G     | 0.169412258 | 6.869461921 | 3.728317258 | 0.000235075 | 0.012537154 |
| LOC10013 | 0.169505502 | 10.0664608  | 3.813800166 | 0.000169803 | 0.010278449 |
| LOC72802 | 0.170140615 | 9.601537459 | 3.409635381 | 0.000750408 | 0.024610007 |
| RBBP7    | 0.171267261 | 9.200378845 | 3.473448169 | 0.000598718 | 0.021426122 |
| SLBP     | 0.171365478 | 8.845023374 | 3.668639296 | 0.00029398  | 0.014386681 |
| AES      | 0.171506718 | 8.587928326 | 4.047059753 | 6.79E-05    | 0.005802258 |
| FLJ12078 | 0.172283281 | 7.666542657 | 3.60472075  | 0.000372347 | 0.01641343  |
| APOBEC3  | 0.172976891 | 7.00980078  | 3.434629858 | 0.000687155 | 0.023372841 |
| CXXC1    | 0.172986403 | 9.679621274 | 3.36688399  | 0.000871354 | 0.026564952 |
| C4orf19  | 0.173088248 | 6.681605981 | 3.906180229 | 0.000118697 | 0.008253561 |
| IER3IP1  | 0.173106503 | 8.628199033 | 3.893060692 | 0.00012494  | 0.008499431 |
| LOC65165 | 0.173671598 | 9.432054113 | 3.559213586 | 0.000439686 | 0.017924332 |
| CD3E     | 0.173699344 | 6.68886674  | 4.440818816 | 1.31E-05    | 0.002086213 |
| WDR48    | 0.173763828 | 7.797507157 | 4.826682061 | 2.33E-06    | 0.000681397 |
| LTA      | 0.173977462 | 7.039527832 | 3.625476374 | 0.000344968 | 0.01589094  |
| ARHGEF1  | 0.174836328 | 7.860714881 | 3.25334536  | 0.001286448 | 0.033177379 |
| POLD1    | 0.17518627  | 7.452382548 | 4.28576607  | 2.54E-05    | 0.003121601 |
| ERI1     | 0.175410831 | 7.734341341 | 4.612738018 | 6.16E-06    | 0.001319697 |
| PAPSS1   | 0.176157298 | 8.627783619 | 3.741731662 | 0.000223464 | 0.012181382 |
| ZDHHC23  | 0.176503793 | 7.279085922 | 3.674375508 | 0.000287765 | 0.014268537 |
| H2AFZ    | 0.17697177  | 11.57455438 | 3.487471549 | 0.000569478 | 0.020730252 |
| EZH2     | 0.177237219 | 7.439698221 | 4.13072764  | 4.83E-05    | 0.004637562 |
| IL17RB   | 0.177307405 | 6.590611117 | 5.410251244 | 1.39E-07    | 7.85E-05    |
| FAM83E   | 0.178746197 | 6.900254521 | 3.184504529 | 0.001620836 | 0.037847643 |
| LOC64794 | 0.179305523 | 6.664398973 | 4.814427694 | 2.47E-06    | 0.000704018 |
| LOC64491 | 0.179322253 | 9.951894285 | 4.359833632 | 1.86E-05    | 0.002652281 |
| SNX26    | 0.179589517 | 7.840200156 | 3.044819166 | 0.002559351 | 0.049722918 |
| POLE2    | 0.180170669 | 7.860567686 | 3.483428811 | 0.000577767 | 0.020811935 |

|          |             |             |             |             |             |
|----------|-------------|-------------|-------------|-------------|-------------|
| LOC72885 | 0.180294146 | 10.60575118 | 3.165271053 | 0.001727714 | 0.039141538 |
| HIGD2A   | 0.18168748  | 9.75167348  | 3.864214988 | 0.00013978  | 0.008902581 |
| MAP3K1   | 0.182519365 | 9.668516044 | 3.272198336 | 0.001206745 | 0.031869959 |
| MXD3     | 0.183335352 | 6.882428999 | 5.645400663 | 4.18E-08    | 2.87E-05    |
| TP53     | 0.183382219 | 6.994935007 | 4.513304879 | 9.55E-06    | 0.001740999 |
| FAM13B   | 0.183486742 | 8.379270574 | 3.703807422 | 0.000257775 | 0.013295985 |
| ARHGEF3  | 0.183646776 | 9.186689291 | 3.533755517 | 0.000482184 | 0.018822333 |
| SH2D1A   | 0.184277875 | 7.336880333 | 3.099482381 | 0.002144512 | 0.044907949 |
| CCDC106  | 0.18497672  | 7.84599153  | 3.221226766 | 0.001433578 | 0.035185616 |
| OSTalpha | 0.185015222 | 6.769504396 | 3.61408567  | 0.00035975  | 0.016183947 |
| C11orf85 | 0.185351944 | 6.424321709 | 9.410595392 | 2.31E-18    | 1.27E-14    |
| AKR1A1   | 0.185917419 | 8.72444573  | 5.34888906  | 1.89E-07    | 0.000101555 |
| PAQR8    | 0.186597456 | 7.234864408 | 3.239336015 | 0.001348809 | 0.033976898 |
| DNMT1    | 0.188062913 | 10.74779775 | 3.144537123 | 0.001850203 | 0.040982364 |
| CIDEB    | 0.188105027 | 7.426238932 | 4.550379399 | 8.12E-06    | 0.001550972 |
| LOC44207 | 0.188195699 | 6.796795956 | 5.710819562 | 2.97E-08    | 2.33E-05    |
| RPL15    | 0.188519443 | 10.5397774  | 3.287474113 | 0.001145555 | 0.030922952 |
| ZFP3     | 0.188807812 | 7.198073131 | 4.179602798 | 3.95E-05    | 0.004195649 |
| NDUFB11  | 0.188926825 | 9.790550053 | 3.973109189 | 9.12E-05    | 0.007105245 |
| ITGB7    | 0.18933969  | 7.636280921 | 3.086165591 | 0.002239431 | 0.046027805 |
| PLCL2    | 0.189978079 | 7.311568239 | 3.110111359 | 0.002071429 | 0.0442738   |
| RORB     | 0.190675352 | 6.604150767 | 4.01106275  | 7.84E-05    | 0.006380456 |
| PTTG1    | 0.190879377 | 9.464660164 | 3.226507243 | 0.001408364 | 0.034809879 |
| ALG6     | 0.191083658 | 8.310610163 | 4.824343275 | 2.36E-06    | 0.000681397 |
| NOS2A    | 0.191085096 | 6.665330588 | 4.141863602 | 4.62E-05    | 0.00460036  |
| KRT86    | 0.191228213 | 6.770029199 | 3.894915722 | 0.000124039 | 0.008492826 |
| FLJ20273 | 0.191623652 | 7.881579065 | 3.551367767 | 0.000452393 | 0.018156921 |
| C9orf142 | 0.191927153 | 8.83139299  | 3.774621578 | 0.000197244 | 0.011257239 |
| ISOC1    | 0.192060773 | 8.275757421 | 3.558590789 | 0.000440682 | 0.01793168  |
| UPB1     | 0.192781846 | 6.501281846 | 4.925164425 | 1.47E-06    | 0.000462798 |
| TMEM51   | 0.193346911 | 9.049159925 | 3.183160972 | 0.001628099 | 0.037896407 |
| CBX7     | 0.193435811 | 7.780827717 | 3.109568569 | 0.002075105 | 0.0442738   |
| DNAJC9   | 0.194622861 | 9.559691416 | 4.512529514 | 9.59E-06    | 0.001740999 |
| PODXL2   | 0.19566461  | 6.971287675 | 3.376537807 | 0.000842552 | 0.025983148 |
| PER3     | 0.195924283 | 7.310939445 | 3.886815049 | 0.000128021 | 0.008550166 |
| HOOK1    | 0.1960808   | 7.951792669 | 3.302090736 | 0.001089717 | 0.030141967 |
| ZADH2    | 0.197066272 | 7.446763003 | 5.127461016 | 5.63E-07    | 0.000220728 |
| LSM3     | 0.197550003 | 9.032205662 | 4.359428875 | 1.86E-05    | 0.002652281 |
| FRAT2    | 0.197643193 | 8.388228897 | 3.471553735 | 0.000602775 | 0.021536204 |
| PSIP1    | 0.197668461 | 7.272072366 | 5.039092626 | 8.60E-07    | 0.000299964 |
| PKIA     | 0.198053806 | 7.057043601 | 3.74048029  | 0.000224524 | 0.012181382 |
| FAM26F   | 0.198292382 | 7.261212004 | 3.071686993 | 0.002347011 | 0.047443315 |
| PTMA     | 0.198334298 | 10.55521999 | 4.05683651  | 6.52E-05    | 0.005644101 |
| LOC64328 | 0.200096834 | 10.24831224 | 3.227175315 | 0.001405203 | 0.034809879 |
| TXLNA    | 0.200103998 | 9.890133083 | 4.857131759 | 2.03E-06    | 0.000609525 |
| TM7SF3   | 0.200115681 | 8.293105741 | 3.066758618 | 0.002384703 | 0.047829454 |
| NDUFA3   | 0.200423243 | 8.993524941 | 4.446808818 | 1.28E-05    | 0.002062683 |
| CASP2    | 0.200475501 | 8.681027377 | 5.289194205 | 2.55E-07    | 0.000133386 |
| MEI1     | 0.200976891 | 6.573557261 | 8.05028543  | 2.69E-14    | 6.56E-11    |
| LOC38856 | 0.200997519 | 8.750376173 | 3.08726366  | 0.00223146  | 0.045909987 |
| CCDC34   | 0.202584017 | 8.280768542 | 3.233517427 | 0.001375525 | 0.03434593  |

|          |             |             |             |             |             |
|----------|-------------|-------------|-------------|-------------|-------------|
| RNASEH2  | 0.202852182 | 7.900529206 | 4.343774    | 1.99E-05    | 0.002749869 |
| C6orf192 | 0.20311075  | 8.218114466 | 3.662392659 | 0.000300892 | 0.014442048 |
| WDR6     | 0.204305875 | 9.284275188 | 3.484753974 | 0.000575038 | 0.020811935 |
| SLFN13   | 0.204530125 | 6.885524578 | 4.652424796 | 5.15E-06    | 0.00119225  |
| ZNF683   | 0.204931674 | 6.775623726 | 4.415158883 | 1.46E-05    | 0.00228111  |
| LOC65392 | 0.207488952 | 6.533097718 | 5.062676157 | 7.68E-07    | 0.000276767 |
| BCKDHA   | 0.207761853 | 8.440437497 | 4.691843174 | 4.32E-06    | 0.00107776  |
| SPATA18  | 0.209617495 | 6.95017792  | 4.14204668  | 4.61E-05    | 0.00460036  |
| SLC44A2  | 0.210073786 | 9.757416072 | 3.604430476 | 0.000372744 | 0.01641343  |
| CD96     | 0.210387589 | 7.181675173 | 3.296443048 | 0.001110985 | 0.030469592 |
| HLTF     | 0.211183862 | 7.902424154 | 3.544520704 | 0.000463763 | 0.018427252 |
| LOC65272 | 0.211578692 | 7.522611794 | 3.858448569 | 0.00014294  | 0.008999514 |
| ADD3     | 0.212066171 | 8.562080689 | 3.084047278 | 0.002254881 | 0.046261911 |
| WDR34    | 0.212575032 | 7.569500294 | 5.144367432 | 5.18E-07    | 0.000207078 |
| ASF1B    | 0.21363277  | 7.809780173 | 3.632787057 | 0.000335784 | 0.015664915 |
| DENND2I  | 0.213777418 | 8.020001444 | 3.487294266 | 0.000569839 | 0.020730252 |
| INA      | 0.214213124 | 6.631407999 | 4.097606926 | 5.53E-05    | 0.005043643 |
| C9orf45  | 0.214473138 | 7.275321    | 4.141098037 | 4.63E-05    | 0.00460036  |
| LIG1     | 0.214562093 | 7.87531346  | 4.654706492 | 5.10E-06    | 0.00119225  |
| RINL     | 0.215510562 | 7.049098264 | 4.556715618 | 7.89E-06    | 0.001540664 |
| DEK      | 0.215983498 | 10.04951766 | 3.363747086 | 0.000880909 | 0.026661454 |
| LOC64730 | 0.216277754 | 9.201033578 | 4.984618205 | 1.11E-06    | 0.0003654   |
| GPX4     | 0.216548175 | 9.788838346 | 3.592129152 | 0.000389939 | 0.016734619 |
| LOC34123 | 0.216646988 | 6.997603999 | 4.012514965 | 7.79E-05    | 0.0063791   |
| NEURL1E  | 0.217033459 | 8.304392589 | 4.273945844 | 2.67E-05    | 0.003205205 |
| C18orf55 | 0.21719994  | 8.822169355 | 4.555865413 | 7.92E-06    | 0.001540664 |
| CKLF     | 0.218952855 | 9.056147115 | 4.007463482 | 7.95E-05    | 0.006448959 |
| HIST1H4C | 0.219018012 | 11.83208315 | 3.765881944 | 0.000203912 | 0.011488624 |
| INPP5D   | 0.219060748 | 7.259888203 | 3.480556473 | 0.000583725 | 0.02099214  |
| MEIS1    | 0.220248411 | 7.852671521 | 4.065039153 | 6.31E-05    | 0.005525625 |
| MCM5     | 0.220496829 | 8.277101326 | 3.970750983 | 9.20E-05    | 0.007127413 |
| NASP     | 0.220606068 | 7.75200577  | 4.213895596 | 3.43E-05    | 0.003768943 |
| SKAP1    | 0.222363874 | 7.003273405 | 3.906443398 | 0.000118575 | 0.008253561 |
| FAM108C  | 0.222405139 | 10.26337527 | 3.36392127  | 0.000880376 | 0.026661454 |
| ARHGEF1  | 0.222543633 | 8.099684589 | 3.212014974 | 0.001478569 | 0.035845051 |
| RBM47    | 0.222558552 | 8.890198071 | 3.27926809  | 0.001178058 | 0.031567639 |
| FANCG    | 0.222934105 | 8.368199359 | 4.523117993 | 9.15E-06    | 0.001704231 |
| NOS2     | 0.222962115 | 6.69380078  | 4.92899056  | 1.45E-06    | 0.000461153 |
| MCM3     | 0.223243464 | 9.758896465 | 3.575095296 | 0.000414982 | 0.017408967 |
| MAP4K1   | 0.225078193 | 7.189477437 | 3.198351305 | 0.001547717 | 0.036805169 |
| ETV6     | 0.225252548 | 8.939635478 | 3.329680485 | 0.000991156 | 0.028420089 |
| NOTCH1   | 0.225585328 | 8.800981734 | 3.568050508 | 0.000425775 | 0.017618741 |
| CHAF1B   | 0.227184031 | 7.506941778 | 5.0118661   | 9.79E-07    | 0.000331281 |
| PPM1M    | 0.2273484   | 8.141289312 | 3.887627528 | 0.000127616 | 0.008550166 |
| TYMS     | 0.228578134 | 8.662862334 | 3.155445446 | 0.001784794 | 0.040152217 |
| BARD1    | 0.229662742 | 8.00437908  | 4.483553551 | 1.09E-05    | 0.001912896 |
| C10orf6  | 0.230396134 | 8.295030351 | 3.301493937 | 0.001091947 | 0.030141967 |
| LOC73053 | 0.231078488 | 11.00079897 | 4.025861786 | 7.39E-05    | 0.006207969 |
| PTTG3P   | 0.231623543 | 9.370699187 | 3.495305047 | 0.000553732 | 0.020393018 |
| SAP30    | 0.232839378 | 8.107690858 | 4.350634099 | 1.93E-05    | 0.002718304 |
| CENPK    | 0.235020942 | 7.641051239 | 4.099328511 | 5.49E-05    | 0.005043643 |

|           |             |             |             |             |             |
|-----------|-------------|-------------|-------------|-------------|-------------|
| TMEM175   | 0.235488947 | 9.170789869 | 3.398947408 | 0.000779081 | 0.025095509 |
| P8        | 0.235733637 | 7.318214753 | 3.458320636 | 0.000631833 | 0.02220925  |
| RALGPS1   | 0.235937444 | 7.347316039 | 3.894851268 | 0.00012407  | 0.008492826 |
| MGMT      | 0.236798106 | 8.460323989 | 3.306509205 | 0.001073343 | 0.029967673 |
| GZMH      | 0.237061724 | 7.121346856 | 3.094657576 | 0.002178465 | 0.045177126 |
| ACAP1     | 0.239749197 | 7.223141508 | 3.332671578 | 0.000980985 | 0.028399438 |
| APOBEC3   | 0.240028966 | 7.032227828 | 4.139025172 | 4.67E-05    | 0.00460036  |
| AK3       | 0.241990187 | 9.471766947 | 4.173225992 | 4.06E-05    | 0.004215145 |
| KRT7      | 0.242204776 | 6.88070823  | 3.106736546 | 0.002094381 | 0.044505244 |
| TRMT5     | 0.243216354 | 10.49028118 | 4.174368014 | 4.04E-05    | 0.004215145 |
| SERBP1    | 0.244763677 | 8.926384149 | 5.593642863 | 5.47E-08    | 3.54E-05    |
| PPFIBP2   | 0.246476129 | 8.824915457 | 3.3547995   | 0.000908702 | 0.027239992 |
| LOC14891  | 0.247873009 | 10.09094898 | 4.299665816 | 2.40E-05    | 0.003042493 |
| C5        | 0.248716899 | 7.330211722 | 4.763484787 | 3.12E-06    | 0.000845536 |
| HADH      | 0.249925245 | 9.496022935 | 4.013420571 | 7.77E-05    | 0.0063791   |
| SLC25A2   | 0.25044892  | 8.726545998 | 3.387898358 | 0.000809796 | 0.0254881   |
| TYK2      | 0.250777831 | 9.458096595 | 3.729235665 | 0.000234262 | 0.012524205 |
| CD6       | 0.25181703  | 7.18863374  | 3.408073485 | 0.000754535 | 0.024708502 |
| PVRIG     | 0.253173743 | 6.851279324 | 4.180132021 | 3.95E-05    | 0.004195649 |
| PHPT1     | 0.253479723 | 8.454642471 | 4.409477932 | 1.50E-05    | 0.002304779 |
| ABCA3     | 0.254697852 | 6.882996053 | 3.085898149 | 0.002241376 | 0.046027805 |
| EYA2      | 0.254983755 | 7.642611052 | 3.125725064 | 0.001968231 | 0.042650824 |
| NUPR1     | 0.255842631 | 7.67835434  | 3.37837129  | 0.000837183 | 0.025945596 |
| HCST      | 0.257487791 | 7.838830001 | 3.127650225 | 0.001955841 | 0.042508095 |
| C14orf106 | 0.258125577 | 8.675411392 | 5.007328353 | 1.00E-06    | 0.000333073 |
| LOC40098  | 0.258518254 | 8.459942591 | 3.437923529 | 0.000679202 | 0.023172955 |
| SIM2      | 0.263224129 | 7.001361945 | 5.155116648 | 4.92E-07    | 0.000207078 |
| MCM6      | 0.264420153 | 9.97265693  | 4.295139783 | 2.44E-05    | 0.003048284 |
| MAP7D2    | 0.266881705 | 6.699647808 | 4.426684147 | 1.39E-05    | 0.002201713 |
| TNFAIP2   | 0.267123134 | 7.393869202 | 4.377283593 | 1.72E-05    | 0.002522981 |
| FOXRED2   | 0.267384728 | 7.297103764 | 5.793601619 | 1.92E-08    | 1.69E-05    |
| C6orf173  | 0.268691946 | 9.234646204 | 3.55791008  | 0.000441773 | 0.017942861 |
| ZCWPW1    | 0.269172501 | 7.532555189 | 4.278776658 | 2.62E-05    | 0.003175496 |
| SMC1B     | 0.271873861 | 6.523196231 | 9.422424019 | 2.12E-18    | 1.27E-14    |
| LOC73245  | 0.272406763 | 7.834774214 | 3.991699776 | 8.47E-05    | 0.006792045 |
| GGA2      | 0.274982183 | 8.347333997 | 4.566382207 | 7.56E-06    | 0.001501482 |
| CD8A      | 0.27544722  | 7.327771043 | 3.46524203  | 0.000616475 | 0.021989942 |
| FAM3B     | 0.275850461 | 7.069548397 | 3.567140907 | 0.000427187 | 0.017643328 |
| GCHFR     | 0.278569376 | 7.426869409 | 5.147185935 | 5.11E-07    | 0.000207078 |
| RASEF     | 0.278615465 | 7.264929298 | 4.098280276 | 5.52E-05    | 0.005043643 |
| CORO1A    | 0.280145738 | 7.588904987 | 3.207710349 | 0.001500038 | 0.036220152 |
| C11orf92  | 0.281649946 | 6.765459039 | 3.261210112 | 0.001252623 | 0.032614967 |
| CXCL17    | 0.28244706  | 7.345056723 | 3.240870197 | 0.001341846 | 0.033976898 |
| TCP11     | 0.286424511 | 6.519741991 | 8.272830094 | 6.14E-15    | 1.69E-11    |
| CDC7      | 0.287759137 | 7.986191761 | 5.070918499 | 7.39E-07    | 0.000270483 |
| NUSAP1    | 0.289669537 | 9.102846714 | 4.336558556 | 2.05E-05    | 0.002779156 |
| EVII      | 0.289771019 | 7.912749354 | 3.276594617 | 0.001188831 | 0.031707744 |
| CDC42EP   | 0.289862045 | 9.939207861 | 3.634673629 | 0.000333451 | 0.015589202 |
| LTF       | 0.290009046 | 6.942191166 | 3.148196916 | 0.001828015 | 0.040613722 |
| C1orf59   | 0.290651559 | 8.496067951 | 3.712380363 | 0.00024961  | 0.012996865 |
| E2F2      | 0.291052106 | 8.670384206 | 4.222271318 | 3.31E-05    | 0.00371425  |

|          |             |             |             |             |             |
|----------|-------------|-------------|-------------|-------------|-------------|
| ATP6V0E  | 0.291355008 | 7.736050255 | 3.599167764 | 0.000380011 | 0.016469393 |
| CYP2E1   | 0.293332247 | 7.379543435 | 3.05140076  | 0.002505762 | 0.049203842 |
| NKG7     | 0.293399123 | 7.539672348 | 3.211386337 | 0.001481686 | 0.035855583 |
| TJP3     | 0.294110433 | 7.226703041 | 3.601125749 | 0.000377292 | 0.016416306 |
| NUP210   | 0.296527595 | 7.485244193 | 3.988529819 | 8.58E-05    | 0.006838213 |
| TDRD9    | 0.296775313 | 6.642948368 | 5.352342381 | 1.86E-07    | 0.000101555 |
| LOC28429 | 0.30017749  | 6.887654721 | 4.501435897 | 1.01E-05    | 0.00179794  |
| PAFAH1E  | 0.304355529 | 9.375752041 | 4.518300826 | 9.35E-06    | 0.00172602  |
| TMPRSS2  | 0.304972579 | 7.435564262 | 3.160475377 | 0.001755359 | 0.039681589 |
| CELSR3   | 0.305941657 | 7.433345025 | 4.269312625 | 2.72E-05    | 0.003250407 |
| EOMES    | 0.307981123 | 7.228585362 | 4.138334887 | 4.69E-05    | 0.00460036  |
| PTPRCAP  | 0.310140095 | 7.323845408 | 3.602962947 | 0.000374757 | 0.016416306 |
| VCAM1    | 0.310643922 | 7.720042061 | 3.309065659 | 0.001063974 | 0.02974388  |
| GVIN1    | 0.314299327 | 7.706020558 | 3.338029924 | 0.000963006 | 0.028101093 |
| MCM2     | 0.316019796 | 8.448632323 | 3.899994707 | 0.000121603 | 0.008402443 |
| CD2      | 0.316894337 | 8.085756524 | 3.368669282 | 0.00086596  | 0.026464159 |
| MLF1IP   | 0.317665705 | 7.866121797 | 4.703216221 | 4.10E-06    | 0.001047542 |
| LOC60672 | 0.318285517 | 7.550565115 | 3.509867343 | 0.000525538 | 0.019822138 |
| PDXK     | 0.319299406 | 9.367085522 | 5.264758129 | 2.88E-07    | 0.000143664 |
| GZMK     | 0.321306228 | 7.329086891 | 3.420973738 | 0.000721068 | 0.023994813 |
| HMGB2    | 0.322339617 | 9.548558325 | 4.800054984 | 2.64E-06    | 0.000723965 |
| LOC38932 | 0.322966388 | 7.085297374 | 4.306776166 | 2.32E-05    | 0.002988454 |
| C16orf75 | 0.323718804 | 8.452942442 | 4.181250402 | 3.93E-05    | 0.004195649 |
| CYP4X1   | 0.32515496  | 7.67947735  | 3.267678035 | 0.001225426 | 0.032169986 |
| TAF7L    | 0.327707282 | 6.527838467 | 7.534762287 | 7.49E-13    | 1.18E-09    |
| LOC10013 | 0.328100578 | 8.879047533 | 3.682757802 | 0.000278905 | 0.014064539 |
| COL9A2   | 0.32896173  | 7.507549406 | 3.373053742 | 0.000852843 | 0.026136005 |
| ALOX5AI  | 0.330030909 | 9.459202893 | 3.187862117 | 0.001602818 | 0.037582513 |
| RASIP1   | 0.334421621 | 8.422023408 | 3.051074289 | 0.002508395 | 0.04921158  |
| CD247    | 0.340625351 | 8.294889091 | 3.183668619 | 0.001625351 | 0.037872573 |
| RNF212   | 0.342903107 | 6.859697293 | 5.273857145 | 2.75E-07    | 0.000140549 |
| NEFH     | 0.345478225 | 6.746220656 | 7.313547209 | 3.00E-12    | 4.12E-09    |
| CD52     | 0.34548223  | 7.648098148 | 3.599699062 | 0.000379271 | 0.016469393 |
| TBC1D10  | 0.345948589 | 7.454322765 | 3.634867176 | 0.000333213 | 0.015589202 |
| C2orf55  | 0.348990841 | 7.68451227  | 4.153232559 | 4.41E-05    | 0.004445734 |
| RPA2     | 0.35557749  | 9.589856312 | 7.059624177 | 1.42E-11    | 1.84E-08    |
| TCEA3    | 0.357826699 | 9.02114652  | 3.769520645 | 0.00020111  | 0.011411205 |
| CD48     | 0.360091968 | 8.014663681 | 3.066135603 | 0.002389507 | 0.047829454 |
| LTB      | 0.361126336 | 7.856861092 | 3.331219703 | 0.00098591  | 0.028420089 |
| KLRB1    | 0.376724032 | 7.676875444 | 3.606855477 | 0.000369439 | 0.016366316 |
| APOC1    | 0.380721443 | 7.861142557 | 3.374138557 | 0.000849626 | 0.026073793 |
| CD3D     | 0.380902514 | 8.222550182 | 3.384597259 | 0.000819189 | 0.025641096 |
| LMO4     | 0.389339763 | 9.31652491  | 4.592930917 | 6.72E-06    | 0.001419142 |
| CLDN10   | 0.393511025 | 7.293577282 | 3.309145305 | 0.001063683 | 0.02974388  |
| UCP2     | 0.394426046 | 7.962266698 | 3.938866058 | 0.000104403 | 0.007621426 |
| ARHGAP4  | 0.395494019 | 7.679199252 | 4.755857036 | 3.23E-06    | 0.000864839 |
| LOC38849 | 0.397616569 | 6.548610368 | 9.262599982 | 6.64E-18    | 2.43E-14    |
| MGC4236  | 0.398700611 | 8.076348625 | 4.295620807 | 2.44E-05    | 0.003048284 |
| CDKN2A   | 0.422898764 | 6.832198548 | 6.495388532 | 3.99E-10    | 4.39E-07    |
| FOXA1    | 0.427651034 | 8.011523395 | 3.058896458 | 0.002445987 | 0.048479641 |
| LOC64984 | 0.430117963 | 9.209038226 | 4.229320517 | 3.22E-05    | 0.00368197  |

|          |             |             |             |             |             |
|----------|-------------|-------------|-------------|-------------|-------------|
| LOC10013 | 0.430809515 | 8.885914234 | 3.094527028 | 0.002179391 | 0.045177126 |
| STAG3    | 0.432415186 | 6.753401424 | 9.040819172 | 3.18E-17    | 9.97E-14    |
| CLDN7    | 0.438366422 | 8.680034857 | 4.407088799 | 1.52E-05    | 0.002304779 |
| TCAM1    | 0.441669017 | 6.812536327 | 9.361672938 | 3.28E-18    | 1.44E-14    |
| CBS      | 0.457025035 | 8.000089323 | 4.342548757 | 2.00E-05    | 0.002749869 |
| PLAC8    | 0.457611932 | 7.84368786  | 3.453893472 | 0.000641844 | 0.022315256 |
| YBX2     | 0.45947695  | 7.162969943 | 6.216348644 | 1.93E-09    | 1.93E-06    |
| KLHL35   | 0.464211451 | 6.988755685 | 7.979373282 | 4.28E-14    | 8.55E-11    |
| GABRP    | 0.491825008 | 7.851979391 | 3.171420566 | 0.001692853 | 0.038787338 |
| ZNF541   | 0.51273037  | 6.670311946 | 10.50509352 | 7.49E-22    | 1.65E-17    |
| UBD      | 0.552878412 | 8.318983367 | 3.450463137 | 0.000649703 | 0.022446409 |
| CALML5   | 0.606598806 | 8.751092566 | 3.675228793 | 0.000286851 | 0.014260115 |
| SYCP2    | 0.637015623 | 6.902684651 | 9.771105666 | 1.71E-19    | 1.88E-15    |
| KCNS1    | 0.646040837 | 7.000397146 | 7.589436896 | 5.30E-13    | 8.95E-10    |
| KRT19    | 0.759971762 | 10.1046093  | 3.505478845 | 0.00053389  | 0.02005909  |
| C4orf7   | 0.896707139 | 7.806618507 | 4.241348945 | 3.06E-05    | 0.003557398 |

---

5858 cohort.

B

2.783771283  
-0.363994114  
3.06123948  
3.040310859  
2.510510249  
0.632193104  
-1.288576695  
-0.77132369  
0.431931537  
-0.855290148  
1.267142939  
0.913337371  
-1.533441108  
-0.885296126  
-1.728513905  
-1.820956394  
2.038329802  
5.616176342  
3.630856937  
1.883996031  
2.944747088  
-0.178905365  
-1.438098674  
-0.402716745  
3.057643645  
3.618781573  
-0.878639892  
1.972382533  
-1.374367808  
0.583012374  
1.709895076  
-1.016627009  
-0.313781477  
-1.374760349  
5.959352618  
0.064489273  
-0.311596586  
-0.561768841  
3.366105175  
2.567479994  
2.772139814  
1.713858875  
-1.388281756  
-0.866166451  
3.802422923  
1.007816877  
-0.846679813  
-0.456612991  
-1.394773669



0.745874327  
1.034785166  
-0.54001397  
-1.883041246  
-0.434033932  
-1.36558483  
0.349341706  
5.327089329  
-0.819802752  
-1.727366403  
-1.38103481  
-1.219133296  
-0.534750875  
-1.32605286  
2.118361312  
0.234999349  
-1.220939196  
-1.888960895  
-0.766364784  
1.869722432  
-1.538918273  
0.103836253  
-1.684513725  
-1.074684036  
-0.762212567  
-0.336640541  
-1.469765813  
0.729464644  
0.229902751  
0.487173064  
-1.4822001  
-0.14409991  
3.519188842  
1.912063328  
-1.720117883  
0.438943226  
1.730632  
-1.224478931  
-0.973533988  
0.333061778  
1.006830452  
-1.337278862  
-0.174458655  
-0.56585825  
-0.896725121  
-1.80762431  
-0.974563292  
1.787221867  
3.263629434  
0.471940569  
-1.310409538

-1.051560223  
3.465896328  
-1.641868676  
4.121363966  
-0.753078479  
-1.309543766  
-0.463367957  
-0.736220517  
-0.637761983  
-1.556980426  
-1.014255311  
1.449291288  
0.431054963  
-0.107729566  
0.030473757  
0.825991555  
-1.516934076  
1.317489711  
0.085434593  
-0.908202507  
0.577718588  
0.289227155  
1.170032747  
-1.913124916  
0.374023904  
-1.830582289  
1.208904553  
-0.909305961  
-1.551725873  
2.368116898  
-0.634636987  
-1.481793179  
-0.810950941  
0.923528058  
7.522331114  
-1.158943239  
-1.741583133  
-0.20038037  
0.026948066  
-1.366907528  
1.489539683  
-1.63294668  
-0.154414999  
5.607879645  
-0.383602821  
-1.266062843  
0.780453581  
0.278876101  
0.77628059  
0.278792673  
0.355362949

1.34863952  
-0.033924508  
-0.839083518  
0.682451195  
0.49762236  
-1.835133166  
-1.474125734  
-0.831650759  
-1.688066852  
-1.193639996  
4.033455903  
0.294455186  
0.727171576  
-0.138190714  
-1.381522386  
0.277402343  
-1.437382353  
-1.32914439  
0.168804562  
4.409275395  
-1.574819202  
-1.528258446  
1.524307438  
-1.060393764  
-1.323259051  
-1.314843001  
0.311183358  
-0.55014819  
-1.487581907  
0.181380285  
0.761799973  
0.481093888  
0.201730518  
-1.471486276  
1.484312691  
0.976719648  
0.190266246  
-0.86087812  
-1.446560883  
-0.063690667  
1.573607706  
-1.218255189  
2.378695851  
-0.71092301  
0.948444335  
0.149896653  
-0.439662311  
-0.34156671  
1.589146228  
-0.445873877  
0.370866091

1.627098085  
0.451472618  
-0.241778217  
-1.878791948  
-1.710029858  
-0.982230875  
-0.274993288  
1.275193208  
-0.15927053  
2.296050644  
-0.143463828  
-1.546420429  
-1.142738973  
0.594583502  
-1.370508648  
1.105793393  
-1.129824728  
-0.732506974  
-1.102252184  
-1.890251575  
-1.812405879  
-0.779271636  
-0.030846684  
-0.34800372  
0.051338852  
-1.452222888  
0.623675714  
-1.538618473  
-1.59002768  
3.074106649  
-0.500862305  
-0.862259109  
-0.74396379  
3.313489625  
-0.296766763  
-1.835027082  
-0.4447141  
-1.15169184  
0.411859723  
-1.819451831  
0.710516094  
-0.234014846  
1.010768712  
3.711413546  
0.151014041  
-1.595540576  
0.476378442  
-0.874026367  
0.994399327  
-1.026445124  
-1.892789506

0.025171481  
-1.503325681  
-0.477835018  
-0.66189715  
-1.246023636  
-1.14110347  
-1.535105171  
-0.380176031  
-0.82912574  
-1.3357809  
-0.443515055  
0.937660737  
-1.706334908  
-1.160095318  
-1.336032841  
-1.113968085  
-0.590399316  
1.821713636  
-1.251091294  
-0.343599872  
0.995088482  
-1.844763132  
-1.503905183  
-1.488083975  
0.042983863  
-1.092405822  
-0.255951984  
-1.868315781  
-0.541223019  
3.513454246  
-1.748255759  
0.830903637  
-0.059746678  
-1.747085168  
2.826224979  
-1.637732965  
-1.474110622  
-1.41097379  
-1.758409421  
-0.994763033  
-0.650345662  
-1.757837308  
-1.809898187  
-0.105717025  
-0.844291086  
-1.897786781  
-1.842927268  
-1.774225933  
-1.195348685  
1.089757185  
0.735283691

-0.847648165  
3.607745794  
-1.873368355  
0.475371386  
0.663420596  
-1.227245933  
-1.30210728  
-1.74667736  
-1.896646003  
-0.439437238  
0.014611895  
-1.27021039  
-1.411375883  
-0.26743194  
1.531538739  
-1.603943633  
-0.731703826  
-0.708341534  
0.588997985  
0.033092914  
-1.807801741  
0.602397996  
-1.663265701  
-1.911009176  
-0.748706754  
3.964604121  
-1.594625528  
-0.853281994  
-0.677925363  
-1.267197001  
-1.876570407  
-1.840851577  
-1.809167205  
-0.946477233  
-0.110046388  
-1.652626769  
-0.996863121  
1.644958529  
0.075858674  
-1.876578995  
-1.50890979  
-0.700895283  
-0.39405873  
-1.754207051  
-1.44014045  
-1.286647179  
-1.717317619  
-1.73947668  
-0.659133058  
-1.546699253  
-0.915503207

-1.531194517  
-0.768943758  
-1.737395868  
-0.820421762  
0.912394768  
-0.009742182  
-1.462709674  
-1.053969768  
2.222515422  
-1.733945307  
-0.942701178  
-1.292123452  
-0.364862894  
-0.826778061  
-1.099932436  
-1.891003026  
-1.147102848  
-1.257236464  
-1.055495872  
-0.638230307  
1.497657188  
-0.63358407  
-1.055039669  
-0.496076087  
-1.898735763  
-0.10818055  
-1.82426881  
-1.797155862  
-1.604121699  
0.072897507  
1.063532959  
-0.714114806  
-1.849207045  
-1.305933285  
-1.426671934  
-0.867732867  
-1.023952178  
-0.803548481  
-1.766941673  
-0.649926196  
-1.734112301  
-0.429272716  
-1.09689613  
-0.433437686  
-0.998883654  
-0.98407201  
-1.554540274  
-0.895057867  
-0.999723779  
-0.43402892  
-0.166758844

-1.623695411  
-0.899140915  
-1.607950485  
-1.871994821  
-0.659634956  
-0.115115387  
-1.758208849  
0.007930749  
-1.851469088  
-1.830475251  
-0.698318142  
-0.499722891  
-0.482191896  
-0.418729745  
-0.542377448  
1.420238582  
-0.529352219  
-0.667481283  
-1.541151189  
2.994711449  
-1.230747654  
-1.213700699  
-1.226913009  
-1.404455659  
-0.866396231  
-0.346912089  
-1.318654458  
-1.131640043  
-1.292557166  
0.836753558  
-1.516597814  
-1.178155998  
-1.805750291  
5.046143867  
-1.76887452  
2.982623067  
-1.436386151  
-0.370631463  
-1.093955106  
2.73913417  
-1.261251643  
-1.740357972  
-0.235249497  
0.038728372  
2.910694523  
-1.586624866  
-0.281180329  
1.146868724  
-0.016111144  
0.53776851  
-1.175981304



-1.394016169  
-1.168163284  
-1.546147023  
-1.140566423  
2.302410364  
-1.588626928  
-1.276654879  
-1.261312994  
-0.136941867  
0.469631724  
-1.021531446  
-0.28576382  
-1.076071502  
-1.174690588  
-1.523810127  
8.886924844  
-1.076588865  
-1.331331661  
-1.041603716  
-0.427956382  
-0.905286407  
-1.896028649  
3.753592502  
-1.689107168  
-0.962329193  
-1.168289272  
-1.336300276  
-1.087606269  
-1.442334618  
-1.550411956  
-0.994431525  
-1.451767093  
-1.388902856  
-1.176948348  
-1.296312063  
-1.578523302  
3.681311171  
0.321982483  
-1.334185973  
-1.089391416  
-1.507271238  
-0.715252287  
-1.818636609  
-1.167681169  
-0.314298231  
1.986589649  
-1.908924553  
-1.164663401  
-1.805388933  
-0.83829126  
-0.666087319

0.500058566  
3.834281772  
-1.718437092  
7.376658415  
0.581055762  
0.220498382  
-1.908041388  
-1.846694872  
-1.495877553  
-0.520577288  
-1.753217306  
-1.85253112  
14.48139245  
-1.045733499  
-0.878063624  
-1.705743077  
1.04455853  
-1.742116442  
-1.304352814  
-1.72187174  
-1.354369571  
-1.719960063  
0.397761049  
-1.241382966  
2.171374514  
0.026294917  
-0.984638214  
1.350819926  
1.822024318  
-0.891742224  
-1.651629877  
-1.644800231  
-1.666678762  
0.812735311  
0.08730834  
1.614479285  
-1.659766611  
-0.834558344  
0.048398573  
-1.415510413  
1.080045917  
-1.815286559  
0.738015478  
2.44184432  
0.963343921  
-1.812744649  
0.491053133  
7.777500841  
-1.583796303  
6.417930689  
1.036102055

0.356668177  
-1.462100585  
-1.465209936  
-1.872939672  
-1.042460499  
0.904464396  
3.418145328  
-1.631000429  
-1.677560259  
4.585069268  
-1.002607492  
-0.111280986  
0.994724609  
-1.057206904  
0.312875377  
-0.090035073  
-0.861883166  
-1.797744713  
-0.75123796  
-0.232491242  
-0.646518743  
3.749419587  
-0.359900966  
2.390756824  
-1.038825911  
-1.84835307  
1.441617435  
2.055079891  
-0.85090409  
-1.651425309  
3.011582602  
-1.325111169  
0.061280958  
2.073142793  
1.666160229  
-1.115416896  
1.29291769  
3.873905154  
2.471519458  
0.956664251  
0.147688152  
1.204380938  
1.543232707  
-0.280824505  
4.757992756  
-0.873849988  
-0.387138511  
-1.299568452  
-0.192812727  
-0.379564621  
2.340440706

-0.436096742  
1.106309983  
2.681143865  
0.411645226  
8.438453404  
6.093675191  
0.246183708  
-1.521303319  
-1.761929934  
0.133421357  
0.789297029  
-0.189065926  
4.108178155  
0.682852129  
0.715042851  
2.724552286  
0.638712464  
-1.352411066  
-1.593764011  
-1.587963528  
3.179111545  
1.417684229  
-0.792415226  
8.29294441  
-0.595369451  
-0.263981226  
-1.848817608  
0.730831253  
-0.942536031  
-0.990723897  
-1.428892109  
-0.401418184  
1.646189367  
-0.762462  
0.45815473  
9.797668871  
0.059458665  
-0.81176523  
0.509288108  
1.152972816  
-0.831803302  
-1.839013578  
2.644783177  
2.534809  
-0.177966823  
-0.518304581  
8.044211826  
2.486610134  
0.748100215  
0.97146002  
-1.528841667

-1.209733916  
-1.760217868  
-0.866319414  
-1.780803236  
-0.913555136  
-1.774502067  
0.754434958  
-1.275376278  
4.420678059  
-0.632273422  
-1.856985188  
-1.049645942  
-1.686548205  
-1.057175653  
-0.233949173  
-0.271080086  
2.094980597  
-1.49923912  
2.517288727  
1.64647872  
-1.660454289  
-0.566150543  
0.937240882  
-0.512294366  
-1.527139661  
-1.58626568  
-0.094617323  
-0.113401191  
2.447472865  
-0.51711365  
-1.848968539  
1.135126046  
-0.960130053  
-0.778480979  
-0.041765446  
0.583763804  
-1.181956153  
0.225783638  
0.07999975  
0.463710033  
-0.093803357  
-1.545430858  
3.147681375  
-0.529459849  
-1.622542931  
5.770702689  
-1.678589443  
2.690151535  
-1.905203618  
-1.093301346  
0.258493049

0.305446979  
0.495821076  
-0.92616267  
-0.7585326  
1.271366008  
0.113612918  
-0.12664368  
-0.97292429  
0.135210569  
-1.771069788  
-1.412762395  
8.671365018  
1.310163954  
-1.337263196  
-0.687367734  
-1.143581286  
-0.647632186  
6.255012359  
-1.013495633  
-1.037601639  
-0.792811973  
2.970463745  
0.025743872  
-0.180172252  
2.057596915  
-1.629723116  
21.5542426  
-1.434523227  
-1.207497814  
-0.792692256  
1.061745717  
0.387853249  
-1.740560314  
-1.36534196  
1.565873044  
-1.493008192  
0.733532505  
-1.229393855  
1.000254855  
2.275109581  
-0.731056488  
2.469143887  
-1.761063484  
17.6864277  
-1.84501337  
-1.376912218  
-0.295642914  
0.094199662  
-1.133468048  
-0.565918352  
1.172383092

-1.734909978  
0.39159352  
1.711452277  
-0.14606663  
-0.438393927  
2.146403836  
-1.270258859  
-1.898115228  
-1.241114757  
-1.332028314  
0.22267311  
2.257784799  
2.039850084  
-0.085692765  
-1.414977865  
0.196709969  
6.366515793  
-0.525747799  
0.423018709  
-0.995982263  
0.975491705  
-1.442185547  
-0.939368164  
20.96963579  
0.294295916  
-1.865266328  
-1.36338617  
-1.630402994  
-0.333502728  
9.105248711  
-0.788510066  
-1.719474313  
2.942950751  
-0.429929021  
3.452208754  
-0.22039953  
2.428012576  
5.949648306  
-1.641587276  
-0.25055824  
-1.166871012  
1.493951179  
12.127498  
-0.080620623  
1.890225535  
-1.591096425  
-1.673342147  
1.074934832  
-0.888553349  
7.459737229  
-1.226034888

-0.314795962  
-0.447051049  
3.868994125  
-0.755123055  
-0.050528322  
-1.339307284  
-1.234530361  
0.775568976  
2.596924967  
-0.982090752  
-0.226399208  
0.152673344  
-0.963932386  
-1.070994782  
1.623708862  
2.174812315  
-1.908972472  
-1.080644229  
-1.746274905  
0.732715785  
5.531330271  
6.286289601  
-1.779688644  
-0.522694911  
-1.614485314  
-0.207861367  
4.671809925  
1.725196777  
1.862132419  
12.95502123  
1.144740071  
1.791398032  
0.943725904  
-1.650006859  
-1.470469843  
0.217198109  
-0.517120821  
-1.847112649  
-1.658756223  
0.713587256  
-0.346405082  
-1.431839452  
-1.13361128  
-1.883840771  
-1.247476323  
3.866126887  
2.021018834  
3.460148239  
-0.671053554  
-1.670635413  
0.809675518



-0.140199143  
0.352072132  
0.814588071  
1.602572811  
-1.191272159  
6.077841667  
-1.467997449  
-0.99830099  
-1.158212876  
-0.651184465  
-1.34944262  
-0.403551429  
1.83334966  
-0.655692136  
0.86606683  
-1.401031915  
8.421685594  
-1.683605858  
-1.437546301  
-1.578950182  
1.260890378  
-0.269252299  
-0.137374818  
0.250777389  
0.548153267  
-0.804059616  
-0.599694547  
0.046762682  
1.390100012  
-0.16845424  
-0.724425168  
-0.939035269  
0.876288623  
0.829261697  
-0.319592696  
2.910447051  
4.517131737  
-0.098943702  
-1.289907564  
2.297137735  
3.612285863  
0.29704312  
0.06624367  
-0.554320608  
1.702841945  
7.156393309  
-1.497244919  
4.46437456  
2.587763538  
-1.905318431  
-0.567418343

-1.554440279  
0.726359729  
-1.232412214  
8.287901657  
3.203586887  
0.166629743  
-0.403384316  
-1.747650212  
-1.387153014  
-0.137135827  
30.71947911  
6.867419989  
-1.33243309  
-1.61573821  
3.355086951  
8.609388039  
-1.185601793  
1.888127698  
1.118380398  
-1.786300881  
-1.716689744  
1.257281823  
-1.371226472  
4.507054208  
1.744890503  
0.835902501  
-0.345474289  
0.411109886  
-0.321649057  
4.945168584  
-1.501250724  
-1.718273186  
3.20042976  
-0.908692337  
0.806923676  
-1.140623465  
5.846768667  
2.586163654  
-0.605811394  
5.449257535  
0.292720879  
-1.828148062  
1.426353974  
-1.369209771  
4.648707461  
-1.842350689  
2.934516878  
6.588835013  
21.80500471  
-1.783119693  
-1.350045728

2.524383097  
0.025579428  
-0.563126582  
3.777520686  
2.807652447  
5.554790431  
3.942822641  
1.745582621  
-0.169423807  
-1.158024312  
-0.368018854  
0.705870828  
-1.792434818  
5.923462669  
-0.074374343  
-0.554895265  
1.578367659  
1.741996613  
3.78705689  
3.381084787  
-0.948877741  
5.207042277  
-0.210447493  
1.262619784  
2.251157122  
3.377594562  
1.244059215  
0.380712303  
-0.57671579  
1.456830275  
1.109788463  
2.019268425  
0.877233389  
-0.948331434  
-1.414879204  
-1.210772918  
3.243583915  
4.961943103  
-0.267043981  
-1.455869808  
-1.055224422  
-0.290379647  
5.327926485  
0.809827763  
-1.583535287  
3.082778201  
-1.14246353  
1.311759089  
-0.528902131  
2.551432225  
1.584816042

-0.837950045  
-0.648454244  
0.835671716  
-1.126990819  
-1.761671594  
-1.045926825  
1.734163383  
1.863845074  
-1.726530683  
1.868191466  
8.035599916  
-0.976905819  
2.351348634  
4.246260143  
1.265949418  
-0.872883059  
0.253940179  
-0.809018294  
1.890144415  
2.784963622  
-1.787075522  
-1.671031206  
-0.902920521  
-1.665386844  
5.307757269  
-0.713891646  
5.972332185  
2.333679773  
2.853759723  
2.656859894  
9.020313661  
-0.323896259  
2.26993564  
30.80013951  
1.186271805  
3.42080666  
-0.626168997  
-0.293389635  
5.936268484  
1.58088948  
-1.42781037  
-1.265959882  
-1.327784316  
23.21031103  
5.591769018  
2.495972683  
-1.218961014  
-0.068026793  
-1.604945495  
0.196005779  
2.051440445

-0.186989963  
-1.886472986  
-1.416768638  
-0.180457211  
1.174675531  
6.883612728  
3.155309595  
3.223940473  
-1.568651418  
2.23316401  
1.731555604  
-0.174324539  
-1.119095538  
-1.029251633  
0.854099112  
-0.933429912  
3.990734549  
-0.481511853  
6.475522118  
-0.768000549  
4.40264044  
2.379138805  
1.894406978  
-1.246225532  
18.63956235  
0.09476045  
-0.919652287  
-1.487227462  
-1.887408681  
-1.499737362  
6.517665886  
17.32204864  
-0.185217622  
-0.067375416  
1.787921123  
15.84169588  
0.393360504  
-1.844144587  
-1.050440831  
-0.161321699  
-0.916240857  
-0.883299713  
3.530268774  
-1.118849471  
0.994062123  
4.213769032  
29.71447692  
2.335556844  
12.68164941  
-1.864964002  
2.078560297

-1.762050697  
28.22336572  
2.775429309  
30.38639547  
2.519555893  
-0.66268735  
11.18865662  
21.36199957  
-1.536188101  
38.37374252  
-0.673704268  
0.06914389  
33.19925639  
18.96907195  
-0.49581227  
2.124927322
