# Supplementary material for: HPV-Related Prognostic Signature Predicts Survival in Head and Neck Squamous Cell Carcinoma
Source: Hindawi journal article supplement (doi:10.1155/2022/7357566), 2022-11-15
Supplement: f1 [file 7357566.f1.zip]

Supplementary Table 3: Clinical information of TCGA cohort.

| <b>Variable</b>         | <b>Case, n</b> |
|-------------------------|----------------|
| Age                     |                |
| >65y                    | 174            |
| ≤65y                    | 324            |
| Gender                  |                |
| Male                    | 365            |
| Female                  | 133            |
| Grade                   |                |
| G1                      | 61             |
| G2                      | 298            |
| G3                      | 118            |
| G4                      | 2              |
| unknow                  | 19             |
| Status                  |                |
| Alive                   | 281            |
| Dead                    | 217            |
| TNM Stage               |                |
| I                       | 25             |
| II                      | 69             |
| III                     | 78             |
| IV                      | 258            |
| unknow                  | 68             |
| T classification        |                |
| T1                      | 45             |
| T2                      | 131            |
| T3                      | 96             |
| T4                      | 170            |
| unknow                  | 56             |
| M classification        |                |
| M0                      | 184            |
| M1                      | 1              |
| unknow                  | 313            |
| N classification        |                |
| N0                      | 169            |
| N1                      | 65             |
| N2                      | 164            |
| N3                      | 7              |
| unknow                  | 93             |
| Smoking classification  |                |
| Yes                     | 378            |
| No                      | 110            |
| unknow                  | 10             |
| Drinking classification |                |
| Yes                     | 330            |
| No                      | 157            |
| unknow                  | 11             |
| HPV status              |                |
| Positive-p16            | 30             |
| Negative                | 79             |
| Other HPV               | 3              |
