# Supplementary material for: HPV-Related Prognostic Signature Predicts Survival in Head and Neck Squamous Cell Carcinoma
Source: Hindawi journal article supplement (doi:10.1155/2022/7357566), 2022-11-15
Supplement: f1 [file 7357566.f1.zip]

Supplementary Table 2: Clinical information of GEO cohort.

| <b>Variable</b>         | <b>Case, <i>n</i></b> |
|-------------------------|-----------------------|
| Age                     |                       |
| >65y                    | 86                    |
| ≤65y                    | 183                   |
| Gender                  |                       |
| Male                    | 222                   |
| Female                  | 47                    |
| Status                  |                       |
| Alive                   | 176                   |
| Dead                    | 93                    |
| TNM Stage               |                       |
| I                       | 18                    |
| II                      | 37                    |
| III                     | 37                    |
| IV                      | 177                   |
| T classification        |                       |
| T1                      | 35                    |
| T2                      | 80                    |
| T3                      | 58                    |
| T4                      | 96                    |
| M classification        |                       |
| M0                      | 262                   |
| M1                      | 7                     |
| N classification        |                       |
| N0                      | 94                    |
| N1                      | 32                    |
| N2                      | 131                   |
| N3                      | 12                    |
| Smoking classification  |                       |
| Yes                     | 221                   |
| No                      | 48                    |
| Drinking classification |                       |
| Yes                     | 238                   |
| No                      | 31                    |
| HPV status              |                       |
| HPV16                   | 60                    |
| Negative                | 196                   |
| Other HPV               | 13                    |
