# Supplementary figures and images for: HPV-Related Prognostic Signature Predicts Survival in Head and Neck Squamous Cell Carcinoma
Source: Hindawi journal article supplement (doi:10.1155/2022/7357566), 2022-11-15

A

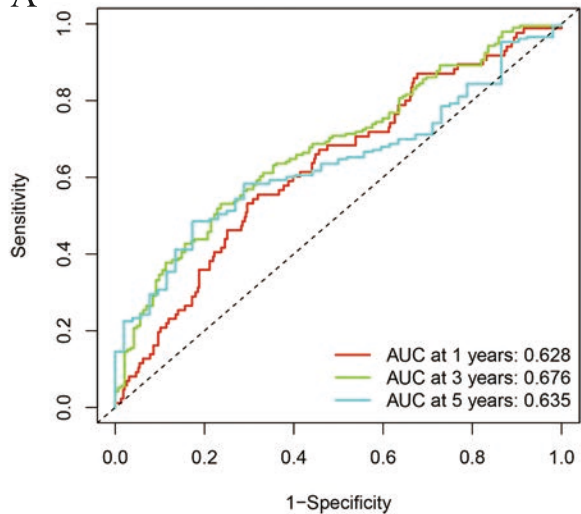

B

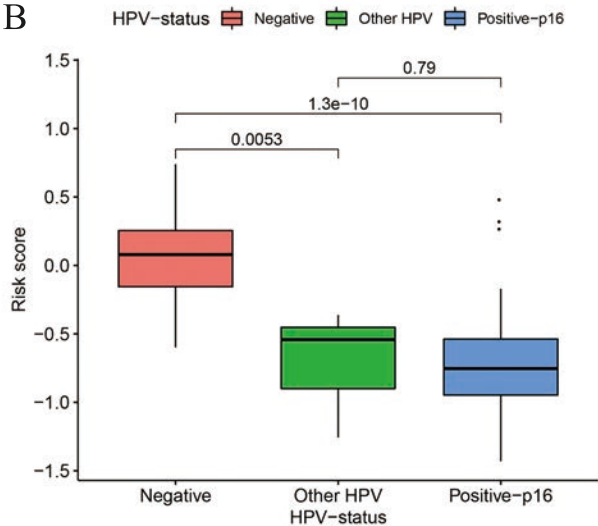

Supplement: f1 [file 7357566.f1.zip]
